# Supplementary material for: Synthesis of tripeptide derivatized cyclopentadienyl complexes of technetium and rhenium as radiopharmaceutical probes
Source: Royal Society of Chemistry journal article supplement (doi:10.1039/c3ob41866a), 2014-01-01

SUPPLEMENTARY INFORMATION FOR

## Synthesis of Tripeptide Derivatized Cyclopentadienyl Complexes of Technetium and Rhenium as Radiopharmaceutical Probes

Qaisar Nadeem,<sup>a</sup> Daniel Can,<sup>b</sup> Yunjun Shen,<sup>b</sup> Michael Felber,<sup>b</sup> Zaid Mahmood<sup>a</sup> and Roger Alberto<sup>b\*</sup>

\* Corresponding Author: Prof. Dr. Roger Alberto, Institute of Inorganic Chemistry, University of Zurich, Winterthurerstr.190, 8057, Zurich, Switzerland; **E-mail:** ariel@aci.uzh.ch

### Table of Contents

|                                                                                                                                                              |    |
|--------------------------------------------------------------------------------------------------------------------------------------------------------------|----|
| General Experimental Conditions:.....                                                                                                                        | 3  |
| <b>SI 1</b> - <sup>1</sup> H NMR (CD <sub>3</sub> OD) spectra of [(HCl·H-Leu-Gly-Gly-OCH <sub>3</sub> )] <b>1</b> .....                                      | 4  |
| <b>SI 2</b> - <sup>1</sup> H NMR (CD <sub>3</sub> OD) spectra of [(HCpCONH-Leu-Gly-Gly-OCH <sub>3</sub> ) <sub>2</sub> ] <b>2</b> .....                      | 5  |
| <b>SI 3</b> - <sup>13</sup> C NMR (CD <sub>3</sub> OD) spectra of [(HCpCONH-Leu-Gly-Gly-OCH <sub>3</sub> ) <sub>2</sub> ] <b>2</b> .....                     | 6  |
| <b>SI 4</b> - <sup>1</sup> H NMR (CD <sub>3</sub> OD) spectra of [(CpCO-Leu-Gly-Gly-OCH <sub>3</sub> )Re(CO) <sub>3</sub> ] <b>3</b> .....                   | 7  |
| <b>SI 5</b> - <sup>1</sup> H NMR (CD <sub>3</sub> OD) spectra of [(CpCO-Leu-Gly-Gly-OH)Re(CO) <sub>3</sub> ] <b>4</b> .....                                  | 8  |
| <b>SI 6</b> - <sup>13</sup> C NMR (CD <sub>3</sub> OD) spectra of [(CpCO-Leu-Gly-Gly-OH)Re(CO) <sub>3</sub> ] <b>4</b> .....                                 | 9  |
| <b>SI 7</b> - <sup>13</sup> C- <sup>1</sup> H Correlation (HSQC) (CD <sub>3</sub> OD) spectra of [(CpCO-Leu-Gly-Gly-OH)Re(CO) <sub>3</sub> ] <b>4</b> .....  | 10 |
| <b>SI 8</b> - <sup>13</sup> C DEPT (CD <sub>3</sub> OD) spectra of [(CpCO-Leu-Gly-Gly-OH)Re(CO) <sub>3</sub> ] <b>4</b> .....                                | 11 |
| <b>SI 9</b> - <sup>1</sup> H NMR (CD <sub>3</sub> OD) spectra of [(CpCO-Trp-Gly-Tyr-OH)Re(CO) <sub>3</sub> ] <b>9</b> .....                                  | 12 |
| <b>SI 10</b> - <sup>13</sup> C NMR (CD <sub>3</sub> OD) spectra of [(CpCO-Trp-Gly-Tyr-OH)Re(CO) <sub>3</sub> ] <b>9</b> .....                                | 13 |
| <b>SI 11</b> -DEPT <sup>13</sup> C NMR (CD <sub>3</sub> OD) spectra of [(CpCO-Trp-Gly-Tyr-OH)Re(CO) <sub>3</sub> ] <b>9</b> .....                            | 14 |
| <b>SI 12</b> - <sup>13</sup> C- <sup>1</sup> H Correlation (HSQC) (CD <sub>3</sub> OD) spectra of [(CpCO-Trp-Gly-Tyr-OH)Re(CO) <sub>3</sub> ] <b>9</b> ..... | 15 |
| <b>SI 13</b> - <sup>1</sup> H NMR (CD <sub>3</sub> OD) spectra of [(CpCO-Leu-Arg-Pro-OH)Re(CO) <sub>3</sub> ] <b>10</b> .....                                | 16 |
| <b>SI 14</b> - <sup>13</sup> C NMR (CD <sub>3</sub> OD) spectra of [(CpCO-Leu-Arg-Pro-OH)Re(CO) <sub>3</sub> ] <b>10</b> .....                               | 17 |
| <b>SI 15</b> - <sup>1</sup> H NMR (CD <sub>3</sub> OD) spectra of [(CpCO-Val-Ala-Leu-OH)Re(CO) <sub>3</sub> ] <b>11</b> .....                                | 18 |
| <b>SI 16</b> - <sup>13</sup> C NMR (CD <sub>3</sub> OD) spectra of [(CpCO-Val-Ala-Leu-OH)Re(CO) <sub>3</sub> ] <b>11</b> .....                               | 19 |
| <b>SI 17</b> - <sup>1</sup> H NMR (CD <sub>3</sub> OD) spectra of [(CpCO-Met-Met-Met-OH)Re(CO) <sub>3</sub> ] <b>12</b> .....                                | 20 |
| <b>SI 18</b> - <sup>13</sup> C NMR (CD <sub>3</sub> OD) spectra of [(CpCO-Met-Met-Met-OH)Re(CO) <sub>3</sub> ] <b>12</b> .....                               | 21 |
| <b>SI 19</b> -MS(ESI) of compound <b>1</b> .....                                                                                                             | 22 |
| <b>SI 20</b> -HPLC trace (UV) of compound <b>2</b> .....                                                                                                     | 23 |

|                                                                                                                                                    |    |
|----------------------------------------------------------------------------------------------------------------------------------------------------|----|
| <b>SI 21-MS(ESI) of compound 2</b> .....                                                                                                           | 23 |
| <b>SI 22-HPLC trace (UV) of compound 3</b> .....                                                                                                   | 24 |
| <b>SI 23-MS(ESI) of compound 3</b> .....                                                                                                           | 24 |
| <b>SI 24-HPLC trace (UV) of compound 4</b> .....                                                                                                   | 25 |
| <b>SI 25-MS(ESI) of compound 4</b> .....                                                                                                           | 25 |
| <b>SI 26-HPLC trace (UV) of compound 5</b> .....                                                                                                   | 26 |
| <b>SI 27-MS(ESI) of compound 5</b> .....                                                                                                           | 26 |
| <b>SI 28-HPLC trace (UV) of compound 6</b> .....                                                                                                   | 27 |
| <b>SI 29-MS(ESI) of compound 6</b> .....                                                                                                           | 27 |
| <b>SI 30-HPLC trace (UV) of compound 7</b> .....                                                                                                   | 28 |
| <b>SI 31-MS(ESI) of compound 7</b> .....                                                                                                           | 28 |
| <b>SI 32-HPLC trace (UV) of compound 8</b> .....                                                                                                   | 29 |
| <b>SI 33-MS(ESI) of compound 8</b> .....                                                                                                           | 29 |
| <b>SI 34-HPLC trace (UV) of compound 9</b> .....                                                                                                   | 30 |
| <b>SI 35-MS(ESI) of compound 9</b> .....                                                                                                           | 30 |
| <b>SI 36-HPLC trace (UV) of compound 10</b> .....                                                                                                  | 31 |
| <b>SI 37-MS(ESI) of compound 10</b> .....                                                                                                          | 31 |
| <b>SI 38-HPLC trace (UV) of compound 11</b> .....                                                                                                  | 32 |
| <b>SI 39-MS(ESI) of compound 11</b> .....                                                                                                          | 32 |
| <b>SI 40-HPLC trace (UV) of compound 12</b> .....                                                                                                  | 33 |
| <b>SI 41-MS(ESI) of compound 12</b> .....                                                                                                          | 33 |
| <b>SI 42-Variation of radiochemical yield (%) of <sup>99m</sup>Tc-complex 13 with time by one pot method from ligand 2 (5 mg) at 90 °C</b> .....   | 34 |
| <b>SI 43-Variation of radiochemical yield (%) of <sup>99m</sup>Tc-complex 13 with time by two pot method from ligand 2 (5 mg) at 90 °C</b> .....   | 34 |
| <b>SI 44 -Variation of radiochemical yield (%) of <sup>99m</sup>Tc-complex 14 with time by one pot method from ligand 5 (2 mg) at 90 °C</b> .....  | 35 |
| <b>SI 45-Variation of radiochemical yield (%) of <sup>99m</sup>Tc-complex 14 with time by two pot method from ligand 5 (5.7 mg) at 90 °C</b> ..... | 35 |
| <b>SI 46-Variation of radiochemical yield (%) of <sup>99m</sup>Tc-complex 15 with time by one pot method from ligand 6 (2 mg) at 90 °C</b> .....   | 36 |

|                                                                                                                                                                                                               |    |
|---------------------------------------------------------------------------------------------------------------------------------------------------------------------------------------------------------------|----|
| <b>SI 47</b> -Variation of radiochemical yield (%) of $^{99m}\text{Tc}$ -complex <b>16</b> with time by one pot method from ligand <b>7</b> (2 mg) at 90 °C .....                                             | 36 |
| <b>SI 48</b> -Variation of radiochemical yield (%) of $^{99m}\text{Tc}$ -complex <b>16</b> with time by two pot method from ligand <b>7</b> (5.3 mg) at 90 °C .....                                           | 37 |
| <b>SI 49</b> -Variation of radiochemical yield (%) of $^{99m}\text{Tc}$ -complex <b>17</b> with time by one pot method from ligand <b>8</b> (2 mg) at 90 °C .....                                             | 37 |
| <b>SI 50</b> -Variation of radiochemical yield (%) of $^{99m}\text{Tc}$ -complex <b>17</b> with time by two pot method from ligand <b>8</b> (5.8 mg) under microwave at 110 °C.....                           | 38 |
| <b>SI 51</b> -Variation of radiochemical yield of $^{99m}\text{Tc}$ -complexes <b>13-17</b> with time by one pot method from ligand <b>2, 5-7</b> (0.6 mg), <b>8</b> (1.5 mg) under microwave at 110 °C ..... | 38 |
| <b>SI 52</b> -HPLC traces of crude labeling solutions with dipeptide <b>2</b> yielding $^{99m}\text{Tc}$ compound <b>13</b> ( $\gamma$ -trace top and UV trace bottom) .....                                  | 39 |
| <b>SI 53</b> -HPLC traces of crude labeling solutions with dipeptide <b>7</b> yielding $^{99m}\text{Tc}$ compound <b>16</b> ( $\gamma$ -trace top and UV trace bottom) .....                                  | 40 |
| <b>SI 54</b> -HPLC traces of crude labeling solutions with dipeptide <b>8</b> yielding $^{99m}\text{Tc}$ compound <b>17</b> ( $\gamma$ -trace top and UV trace bottom) .....                                  | 41 |
| <b>SI 55</b> -HPLC coinjection traces of Re-complex <b>4</b> and the corresponding $^{99m}\text{Tc}$ -complex <b>13</b> .....                                                                                 | 42 |
| <b>SI 56</b> -HPLC coinjection traces of Re-complex <b>9</b> and the corresponding $^{99m}\text{Tc}$ -complex <b>14</b> .....                                                                                 | 42 |
| <b>SI 57</b> -HPLC coinjection traces of Re-complex <b>10</b> and the corresponding $^{99m}\text{Tc}$ -complex <b>15</b> .....                                                                                | 43 |
| <b>SI 58</b> -HPLC coinjection traces of Re-complex <b>11</b> and the corresponding $^{99m}\text{Tc}$ -complex <b>16</b> .....                                                                                | 44 |
| <b>SI 59</b> -HPLC coinjection traces of Re-complex <b>12</b> and the corresponding $^{99m}\text{Tc}$ -complex <b>17</b> .....                                                                                | 45 |

#### General Experimental Conditions:

Reactions were carried out in dried glassware under nitrogen environment. Solvents were dried using standard techniques. IR spectra were recorded as KBr pellets on a Perkin-Elmer BX II IR spectrometer. Some chemical reactions were monitored by TLC, using silica gel plates MERCK 60 F<sub>254</sub> with 0.25 mm of thickness, in an aluminum support; the plates were analyzed with UV radiation. UV/vis detection was performed at 250 nm. The detection of radioactive  $^{99m}\text{Tc}$  complexes was performed with a Berthold LB 507 radiodetector equipped with a NaI(Tl) scintillation detector. The elementary analyses for some compounds were not performed due to various contents of trifluoroacetate after purification with the preparative HPLC.

SI 1-<sup>1</sup>H NMR (CD<sub>3</sub>OD) spectra of [(HCl·H-Leu-Gly-Gly-OCH<sub>3</sub>)] **1**

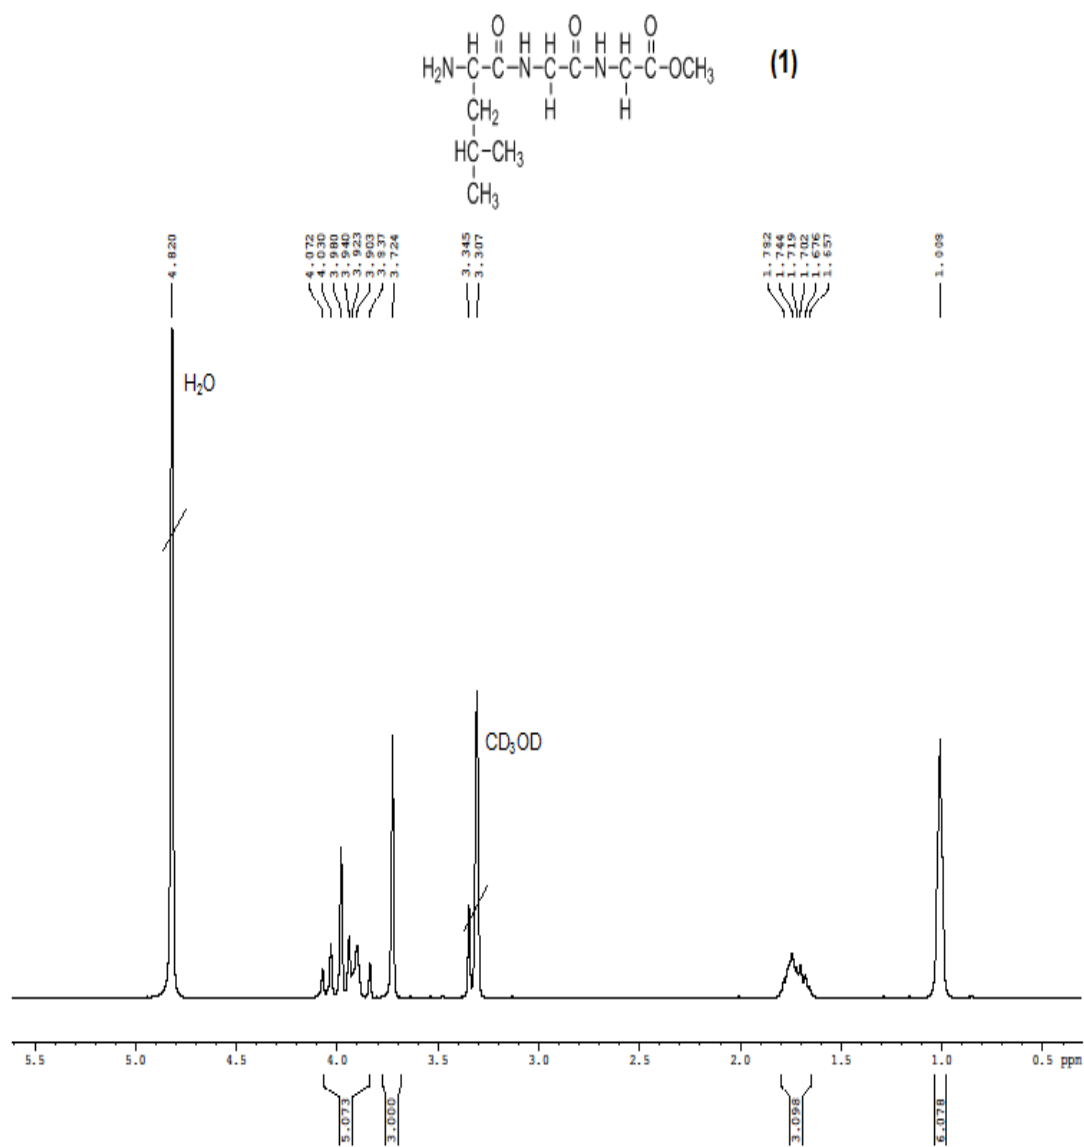

SI 2-<sup>1</sup>H NMR (CD<sub>3</sub>OD) spectra of [(HCpCONH-Leu-Gly-Gly-OCH<sub>3</sub>)<sub>2</sub>] 2

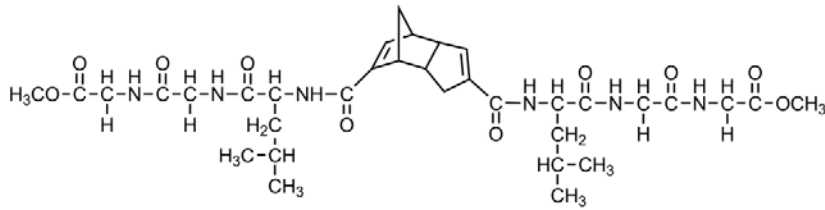

AV2-500: 1H NMR, A\_QAI\_250312 MEOD, QAI 4.3

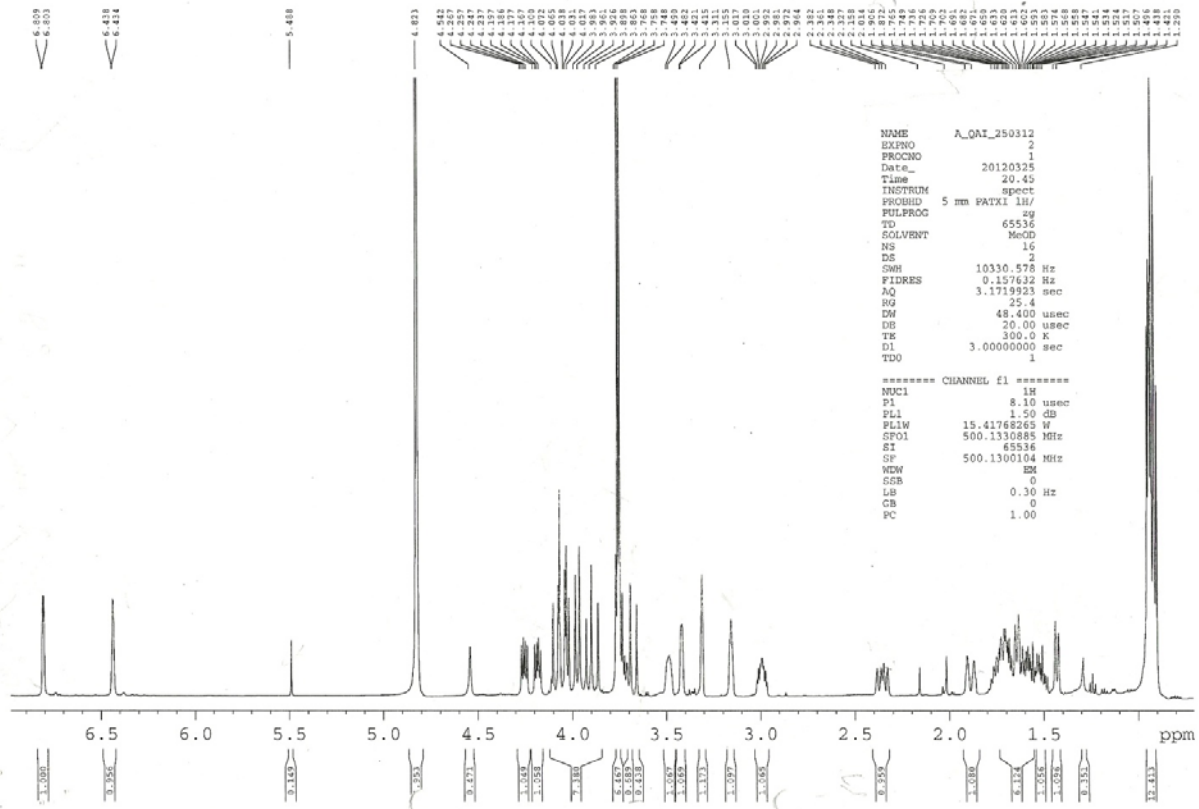

SI 3-<sup>13</sup>C NMR (CD<sub>3</sub>OD) spectra of [(HCpCONH-Leu-Gly-Gly-OCH<sub>3</sub>)<sub>2</sub>] 2

AV2-500: 13 C NMR, A\_QAI\_250312 MEOD, QAI 4.3

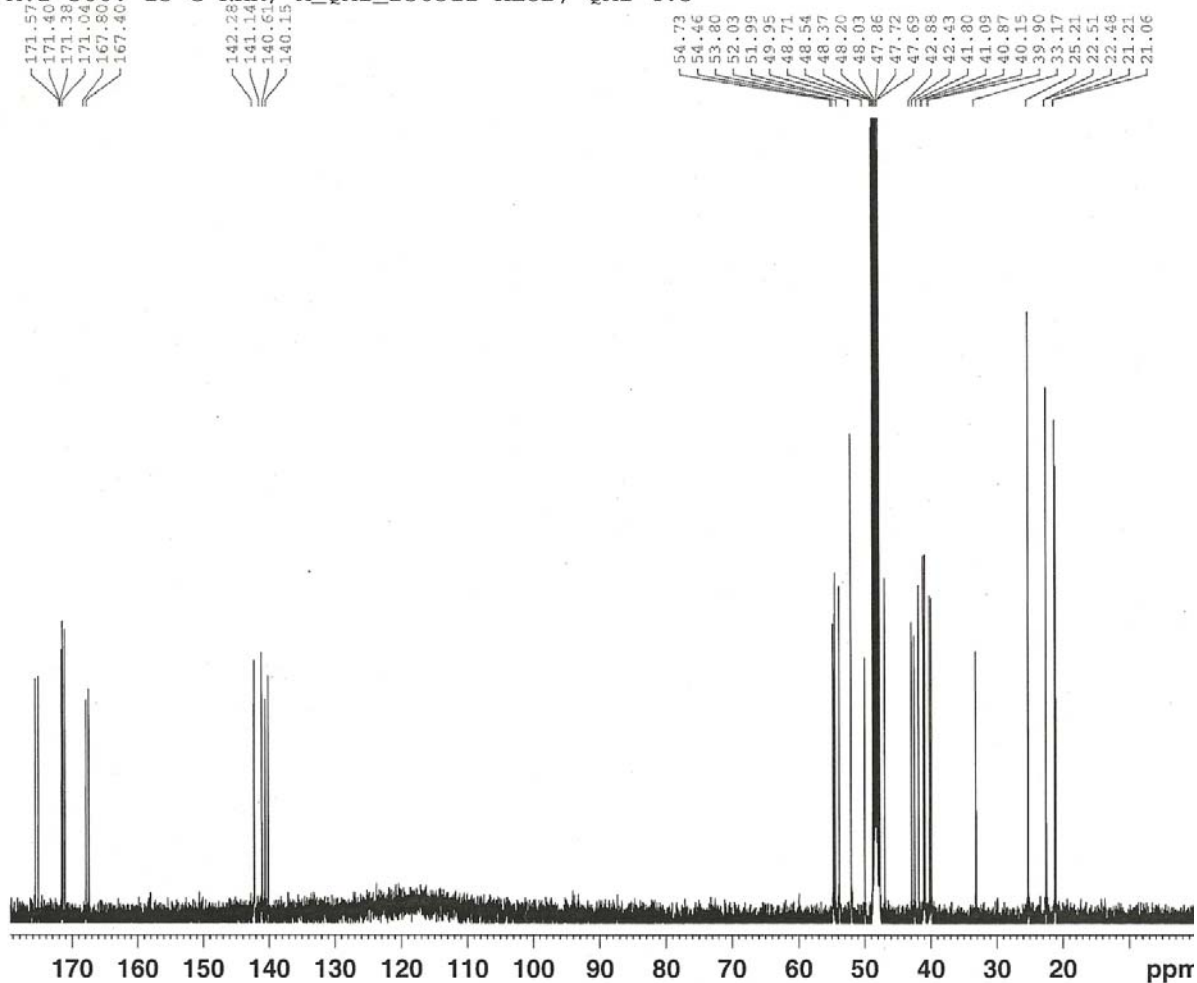

SI 4-<sup>1</sup>H NMR (CD<sub>3</sub>OD) spectra of [(CpCO-Leu-Gly-Gly-OCH<sub>3</sub>)Re(CO)<sub>3</sub>] **3**

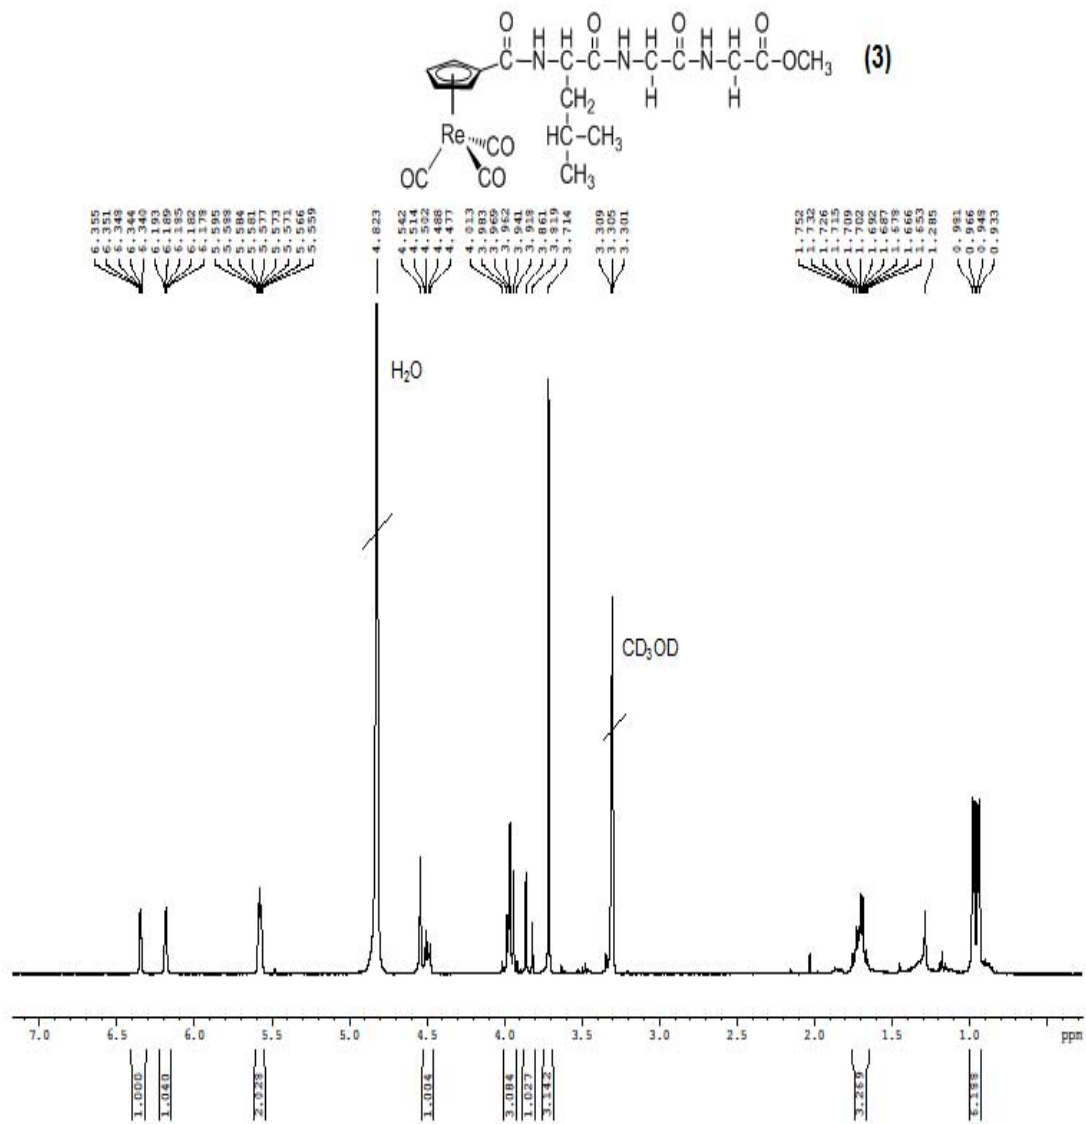

SI 5-<sup>1</sup>H NMR (CD<sub>3</sub>OD) spectra of [(CpCO-Leu-Gly-Gly-OH)Re(CO)<sub>3</sub>] **4**

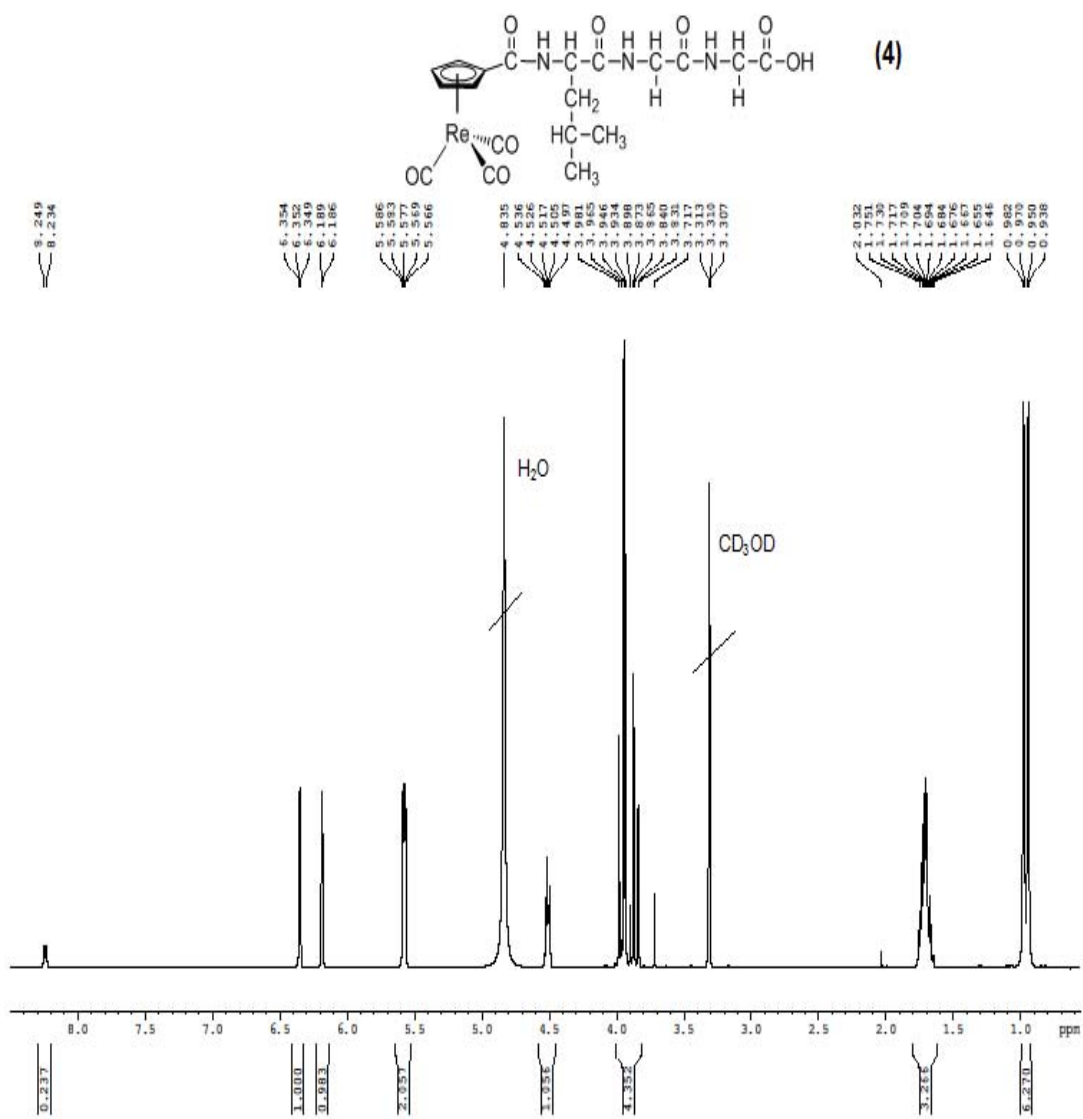



SI 6-<sup>13</sup>C NMR (CD<sub>3</sub>OD) spectra of [(CpCO-Leu-Gly-Gly-OH)Re(CO)<sub>3</sub>] **4**

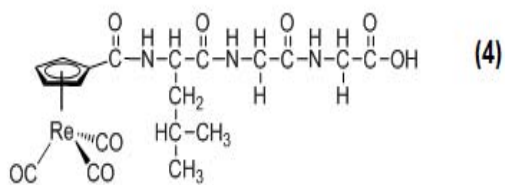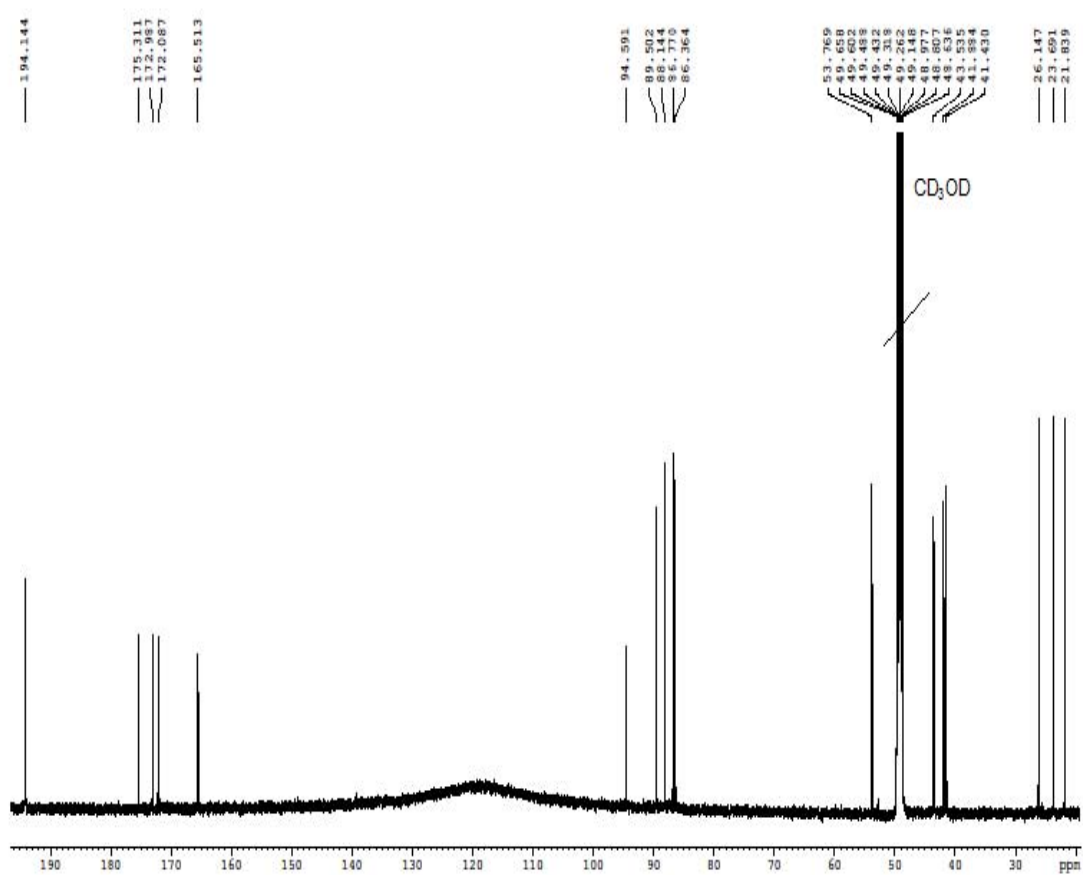

SI 7-<sup>13</sup>C- <sup>1</sup>H Correlation (HSQC) (CD<sub>3</sub>OD) spectra of [(CpCO-Leu-Gly-Gly-OH)Re(CO)<sub>3</sub>]  
4

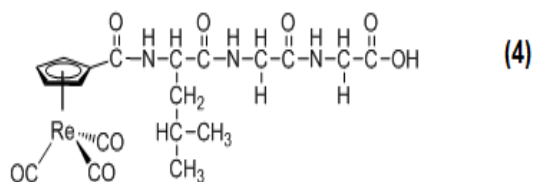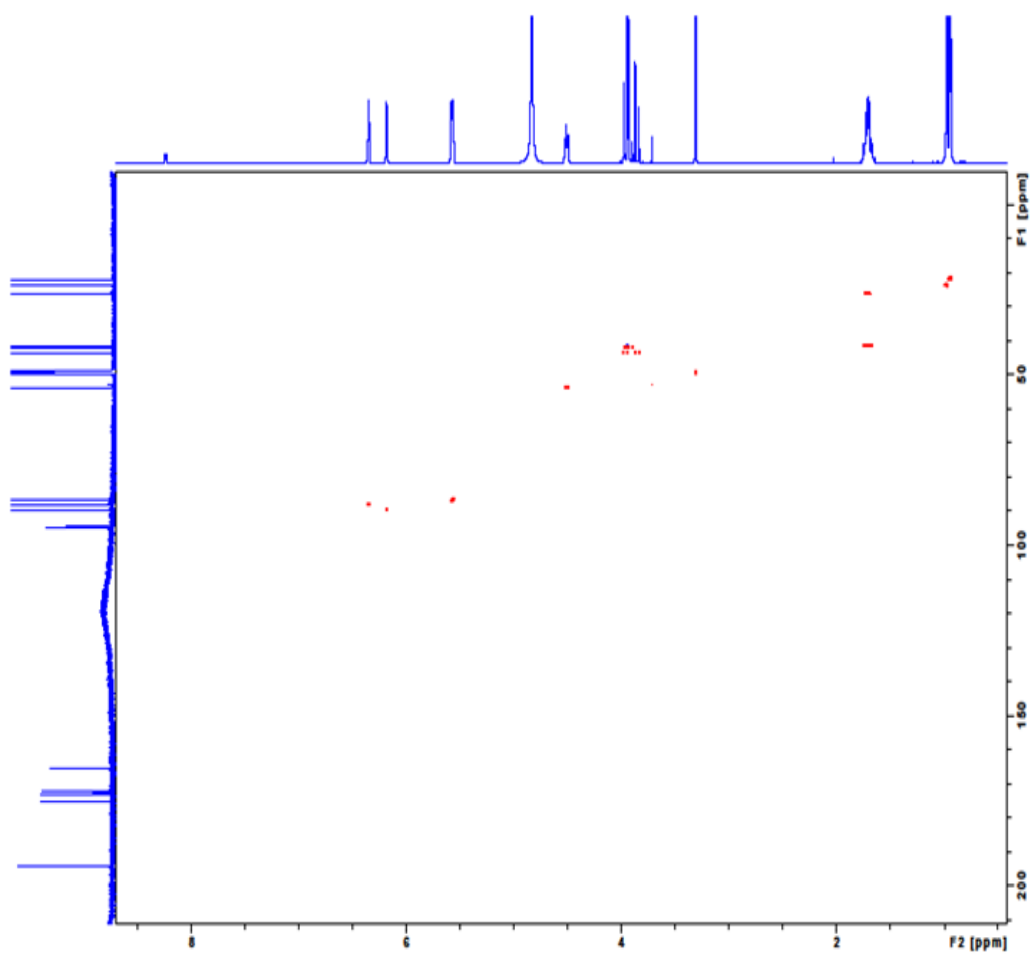

SI 8-<sup>13</sup>C DEPT (CD<sub>3</sub>OD) spectra of [(CpCO-Leu-Gly-Gly-OH)Re(CO)<sub>3</sub>] **4**

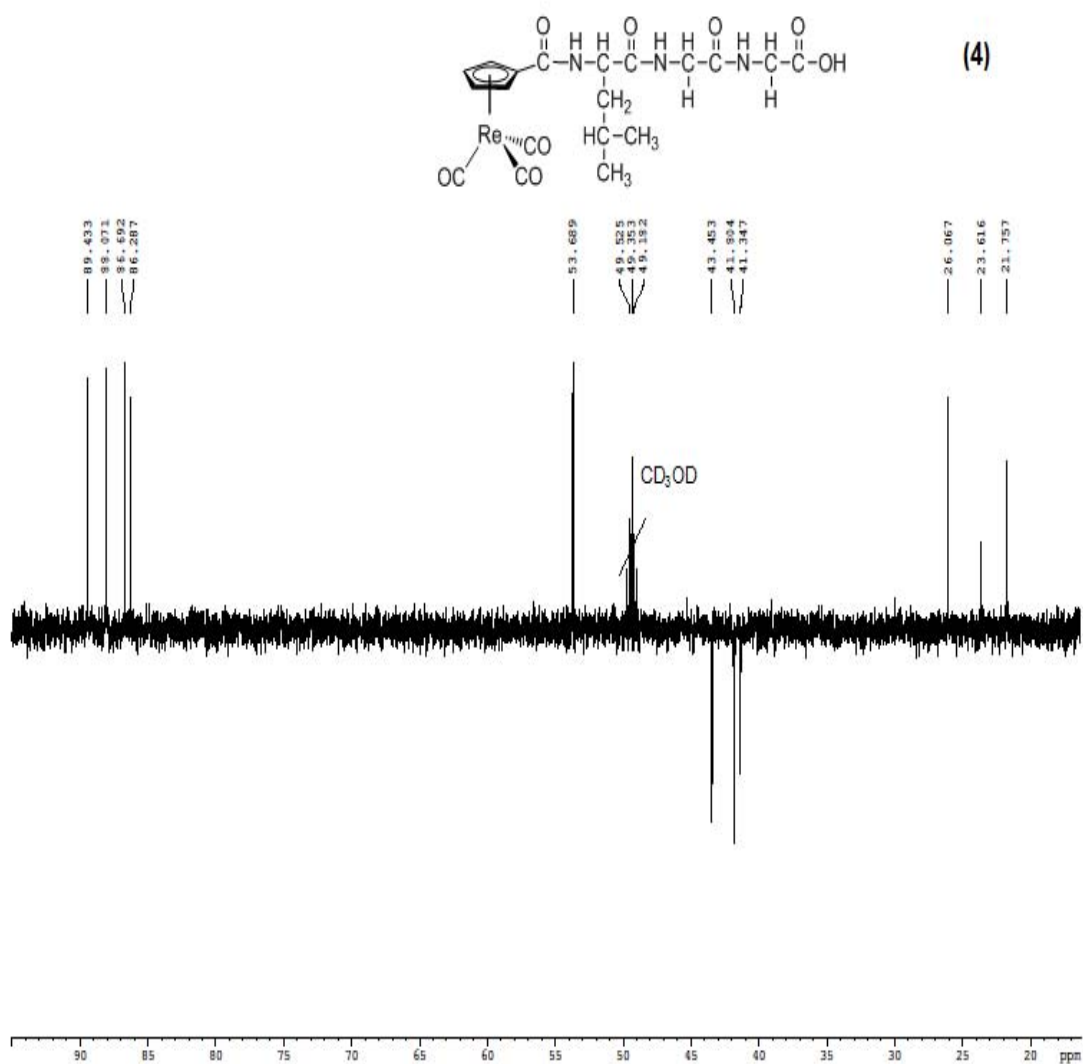

SI 9-<sup>1</sup>H NMR (CD<sub>3</sub>OD) spectra of [(CpCO-Trp-Gly-Tyr-OH)Re(CO)<sub>3</sub>] **9**

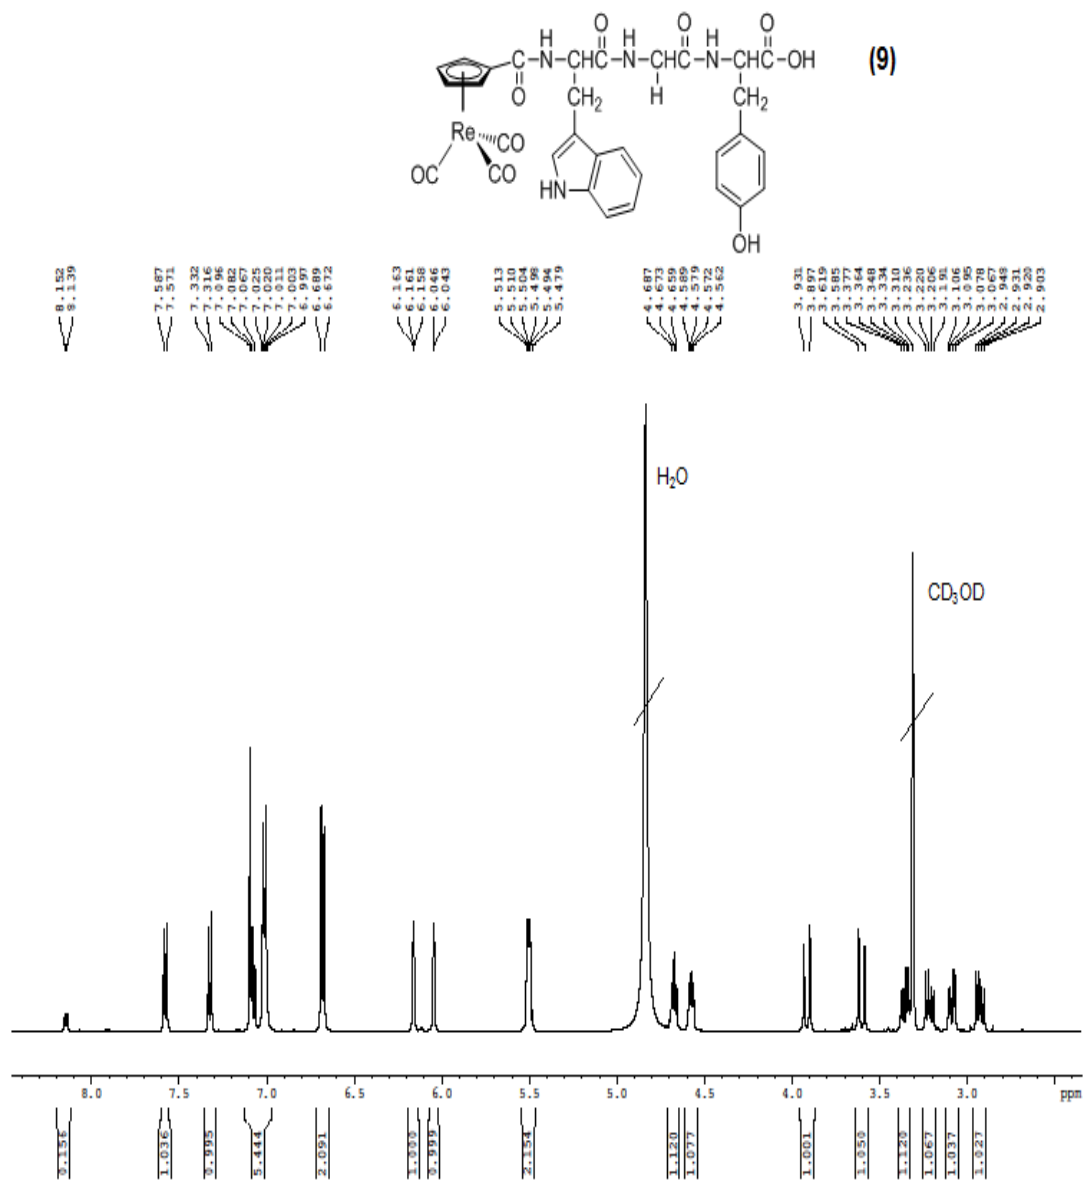

SI 10-<sup>13</sup>C NMR (CD<sub>3</sub>OD) spectra of [(CpCO-Trp-Gly-Tyr-OH)Re(CO)<sub>3</sub>] **9**

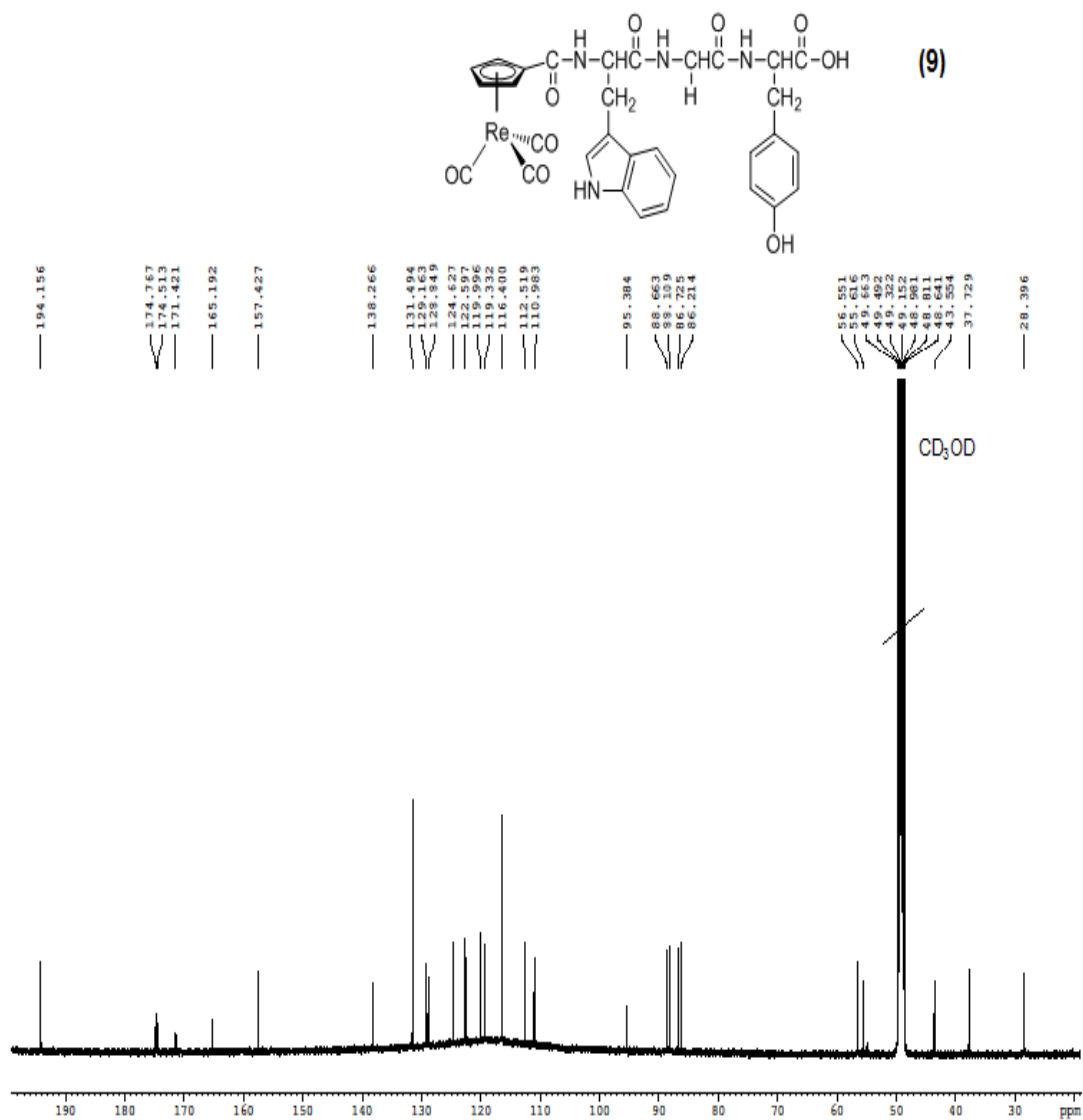

SI 11-DEPT<sup>13</sup>C NMR (CD<sub>3</sub>OD) spectra of [(CpCO-Trp-Gly-Tyr-OH)Re(CO)<sub>3</sub>] **9**

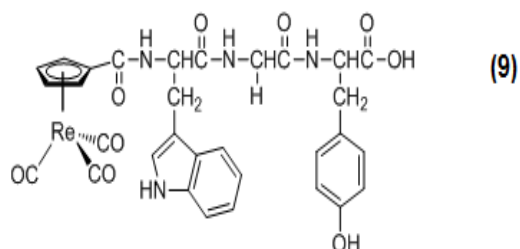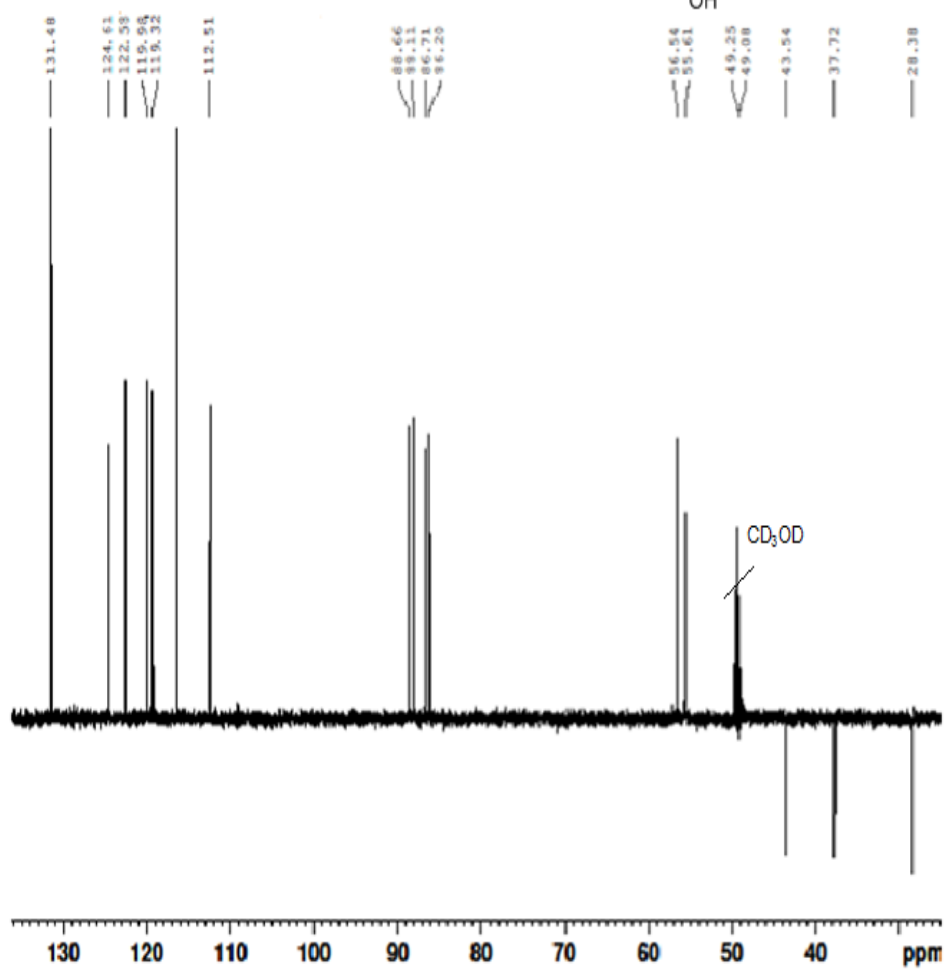

SI 12- $^{13}\text{C}$ - $^1\text{H}$  Correlation (HSQC) ( $\text{CD}_3\text{OD}$ ) spectra of  $[(\text{CpCO-Trp-Gly-Tyr-OH})\text{Re}(\text{CO})_3]$  **9**

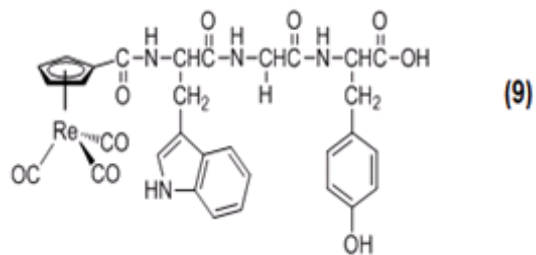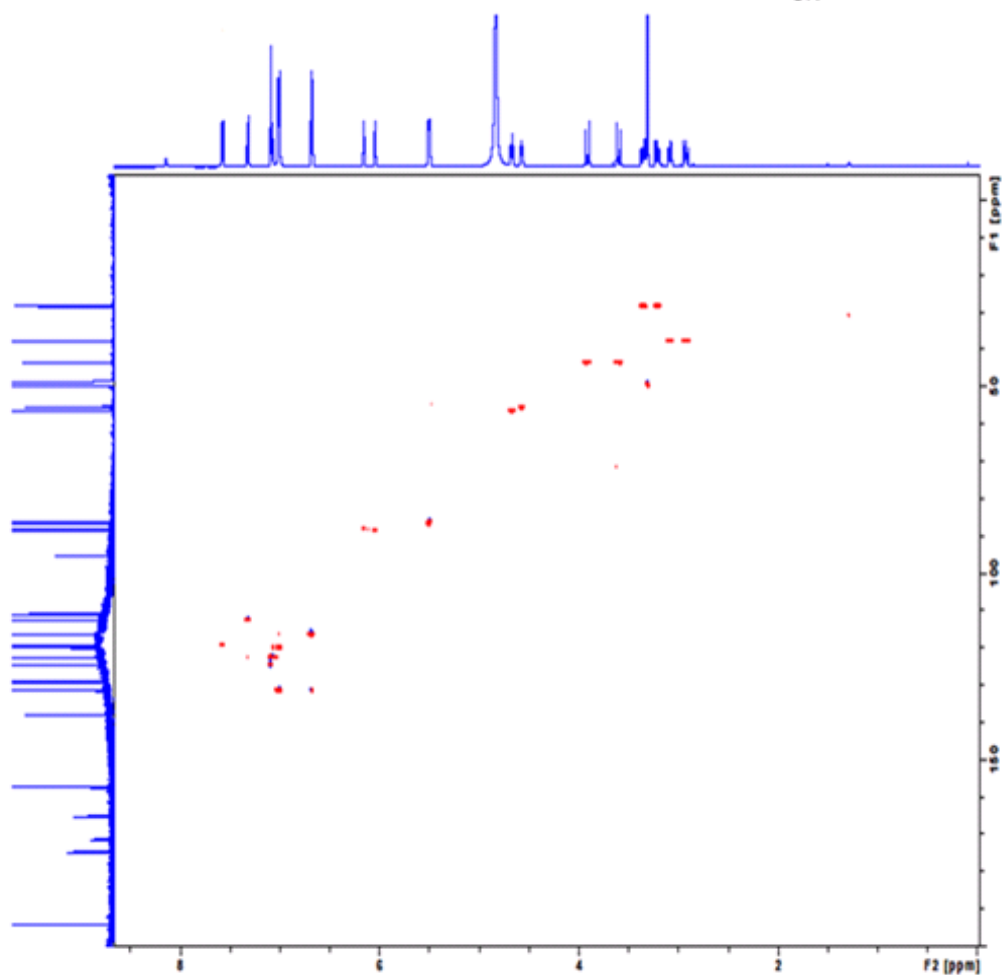

SI 13-<sup>1</sup>H NMR (CD<sub>3</sub>OD) spectra of [(CpCO-Leu-Arg-Pro-OH)Re(CO)<sub>3</sub>] 10

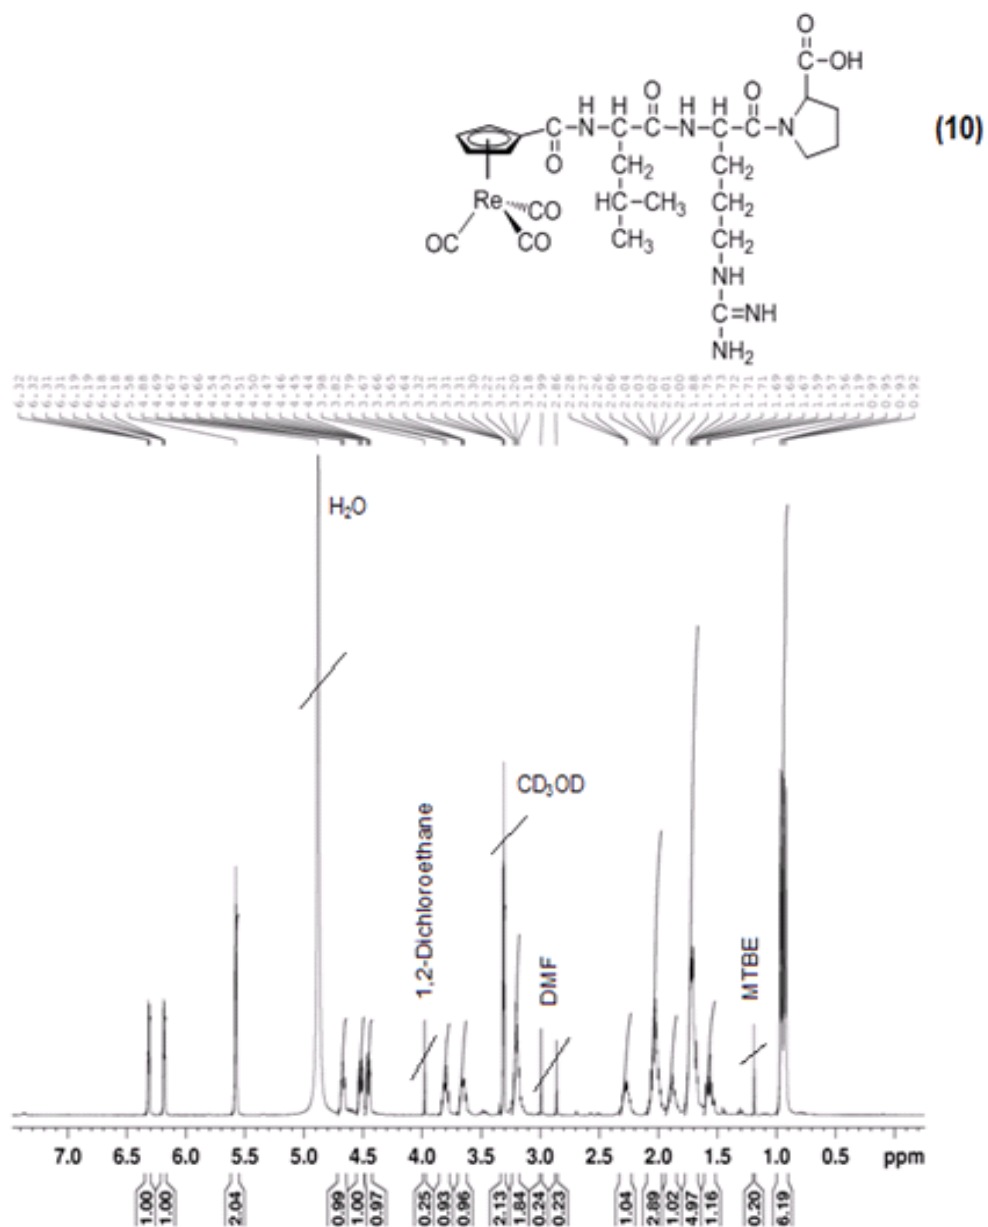



SI 14-<sup>13</sup>C NMR (CD<sub>3</sub>OD) spectra of [(CpCO-Leu-Arg-Pro-OH)Re(CO)<sub>3</sub>] **10**

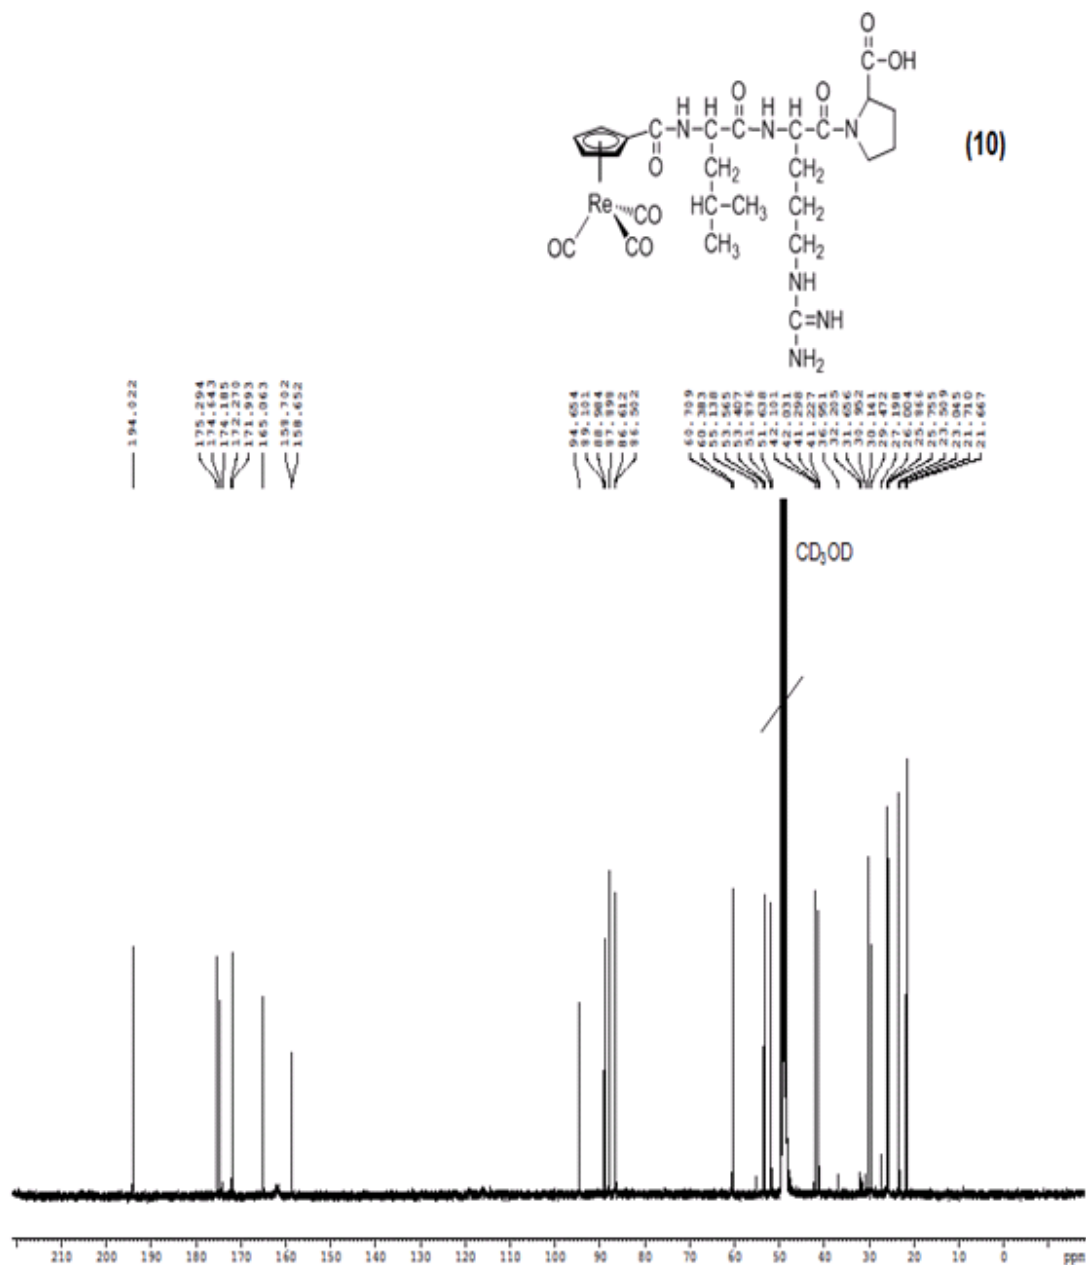

SI 15-<sup>1</sup>H NMR (CD<sub>3</sub>OD) spectra of [(CpCO-Val-Ala-Leu-OH)Re(CO)<sub>3</sub>] **11**

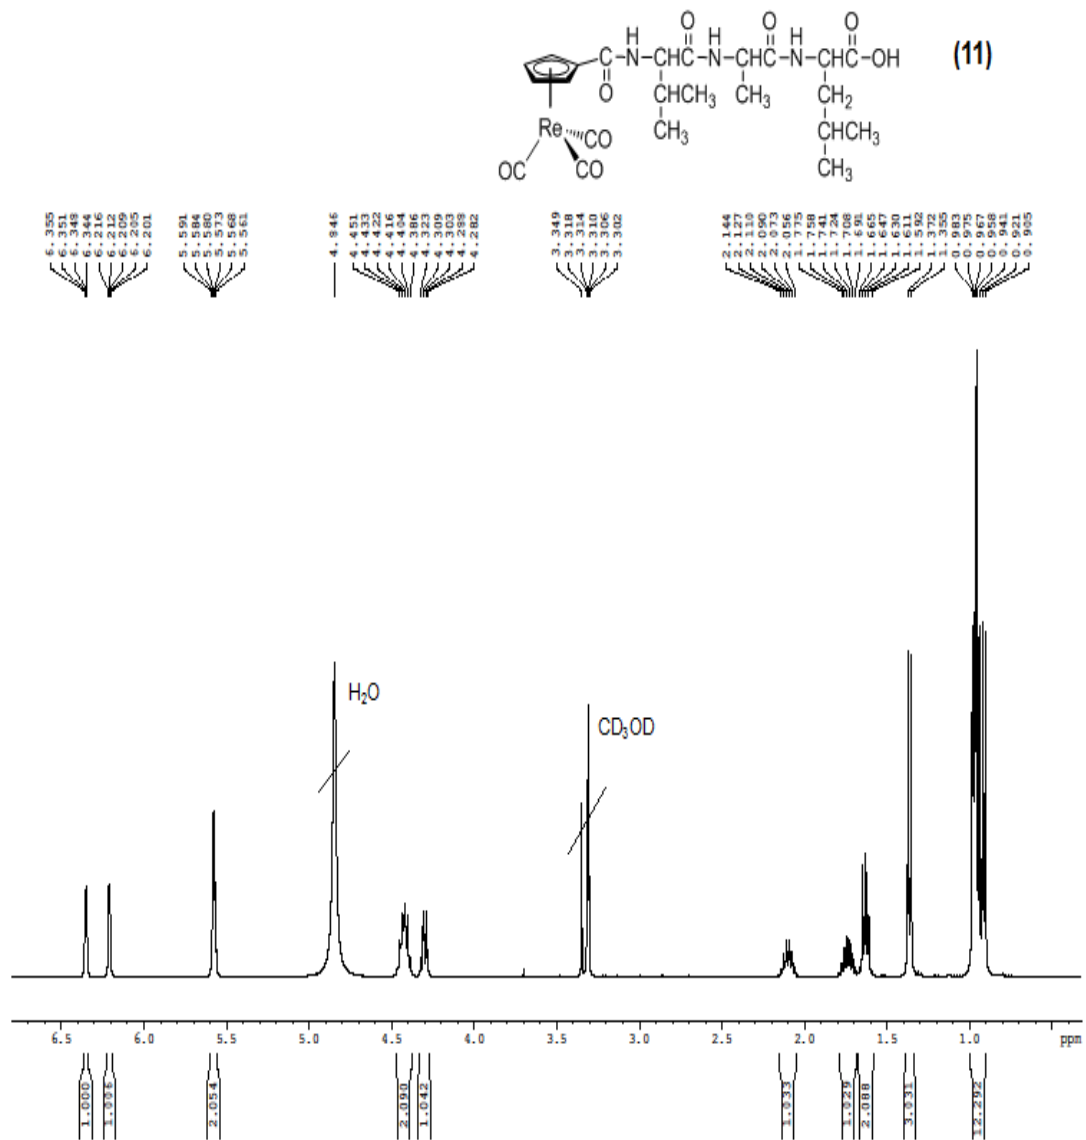

SI 16-<sup>13</sup>C NMR (CD<sub>3</sub>OD) spectra of [(CpCO-Val-Ala-Leu-OH)Re(CO)<sub>3</sub>] **11**

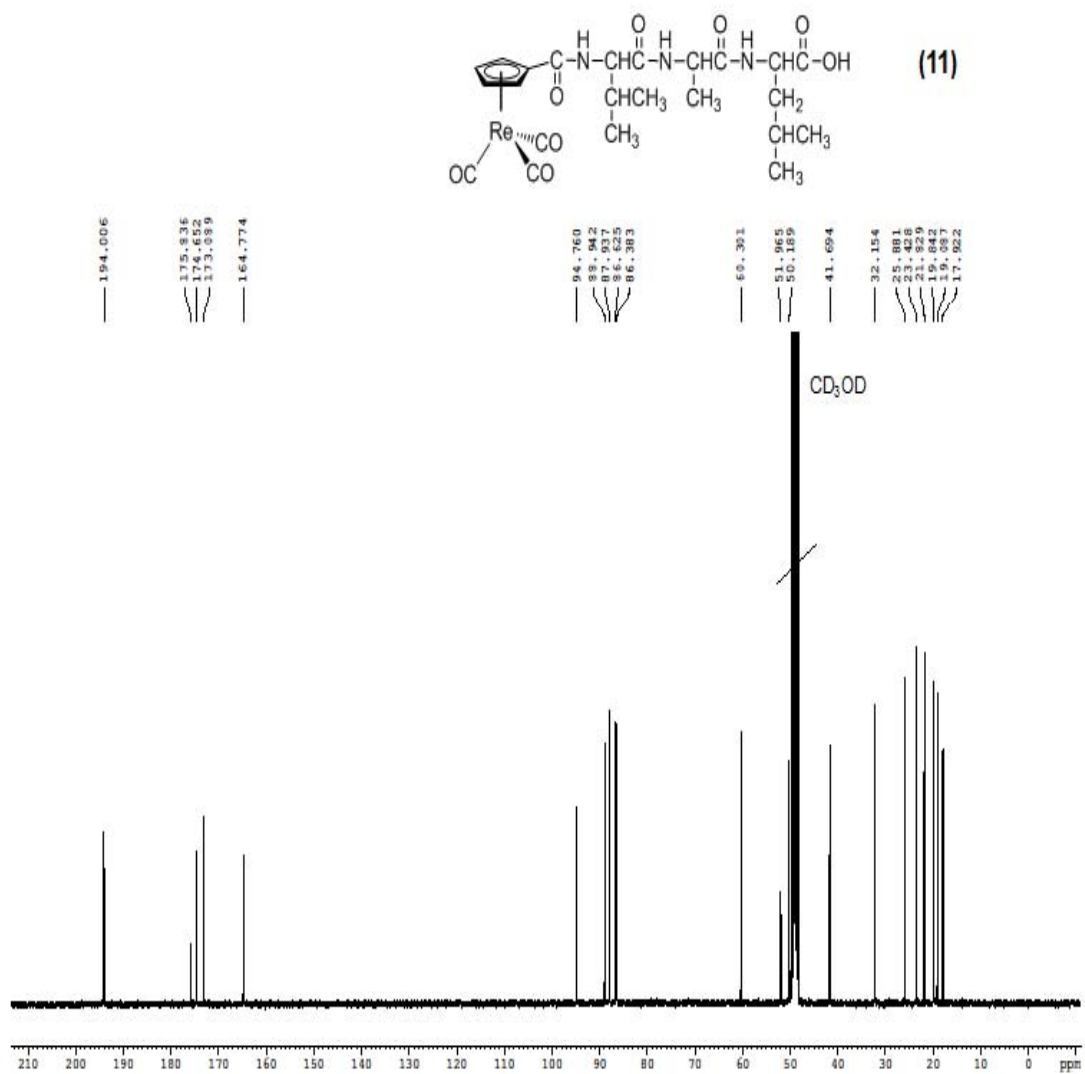

SI 17-<sup>1</sup>H NMR (CD<sub>3</sub>OD) spectra of [(CpCO-Met-Met-Met-OH)Re(CO)<sub>3</sub>] **12**

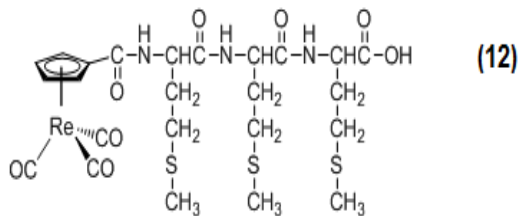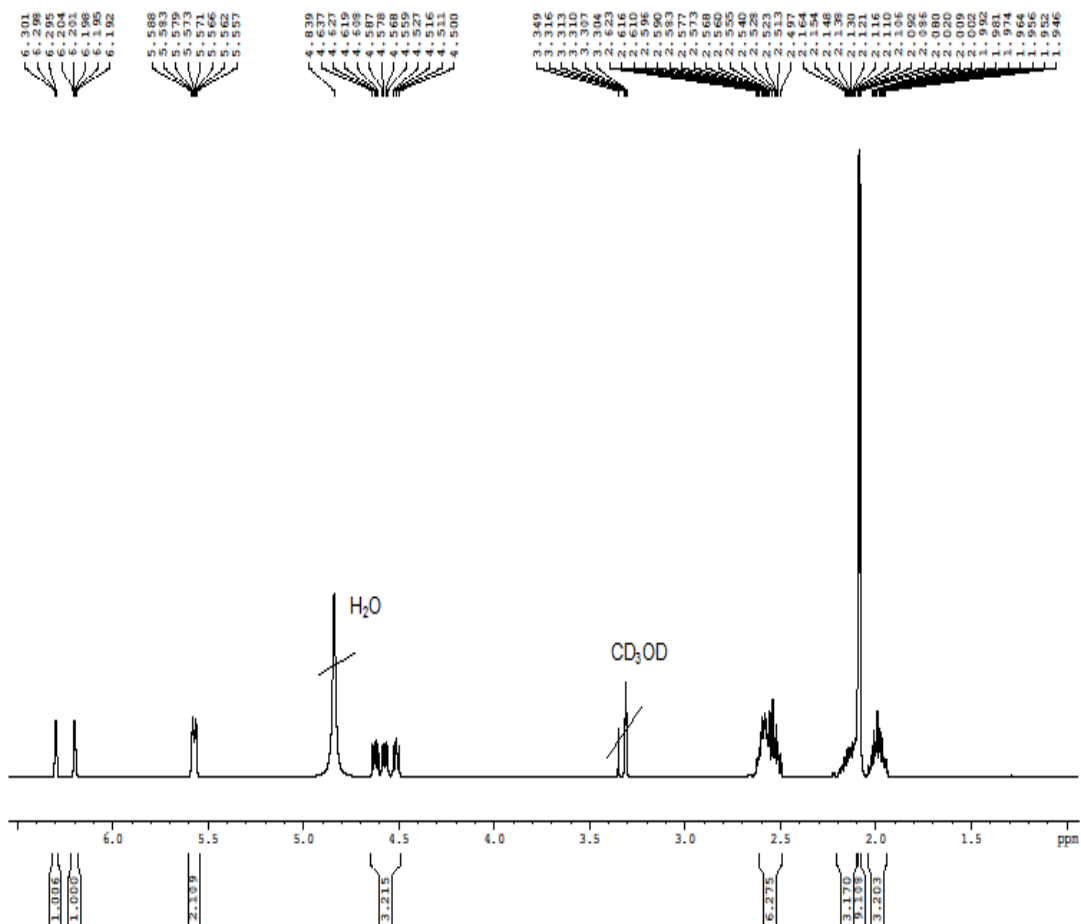

SI 18-<sup>13</sup>C NMR (CD<sub>3</sub>OD) spectra of [(CpCO-Met-Met-Met-OH)Re(CO)<sub>3</sub>] **12**

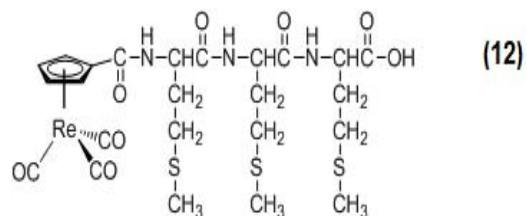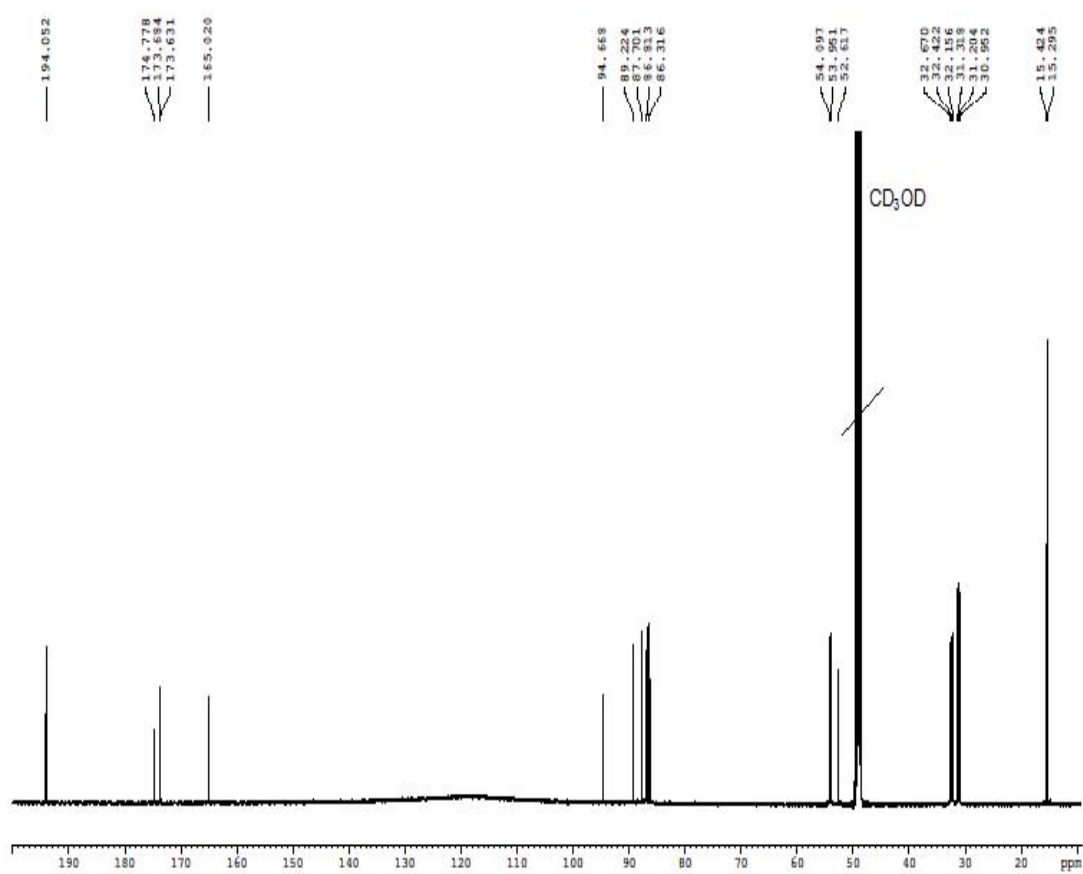

SI 19-MS(ESI) of compound 1

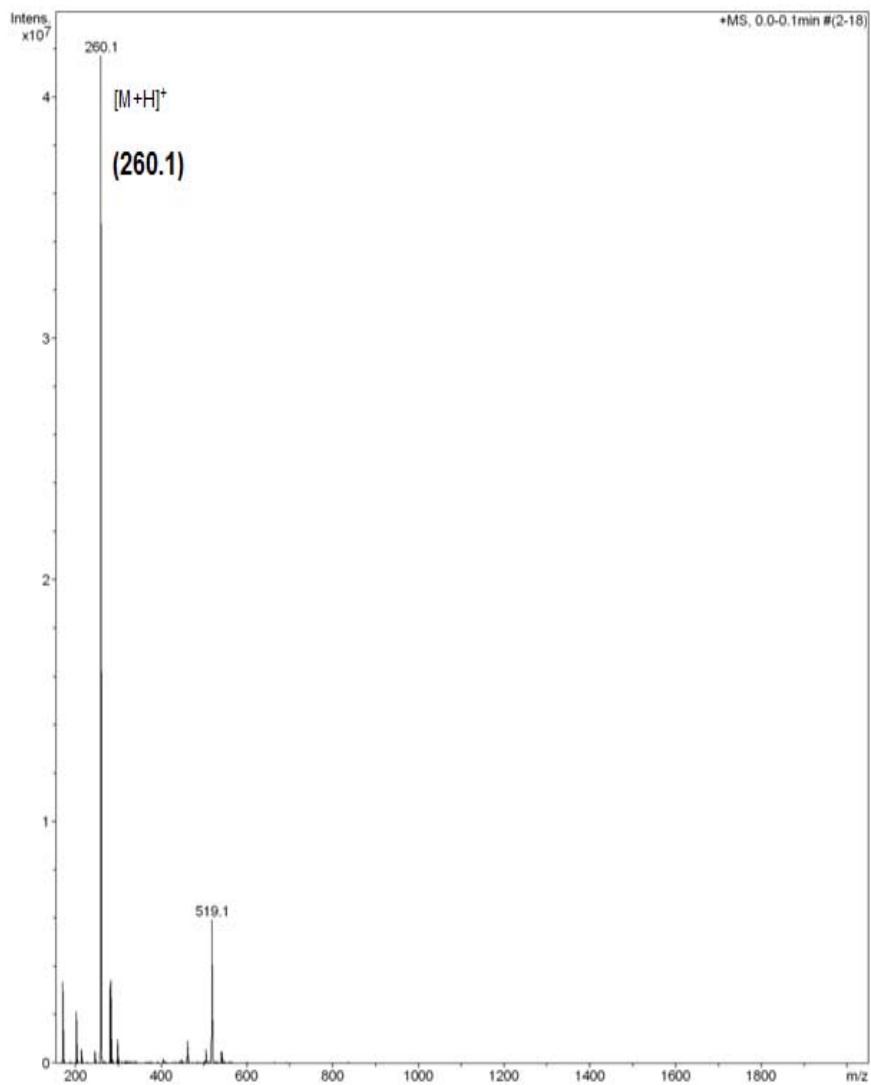

SI 20-HPLC trace (UV) of compound 2

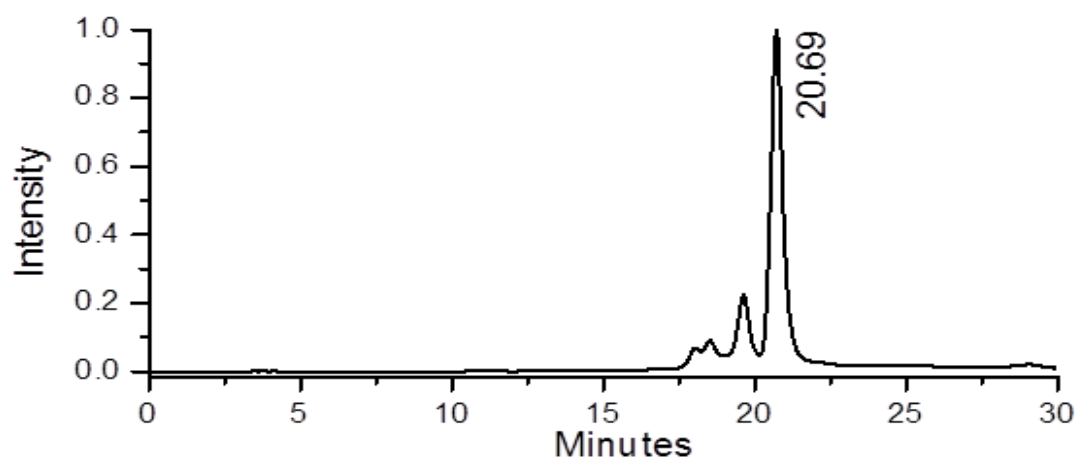

SI 21-MS(ESI) of compound 2

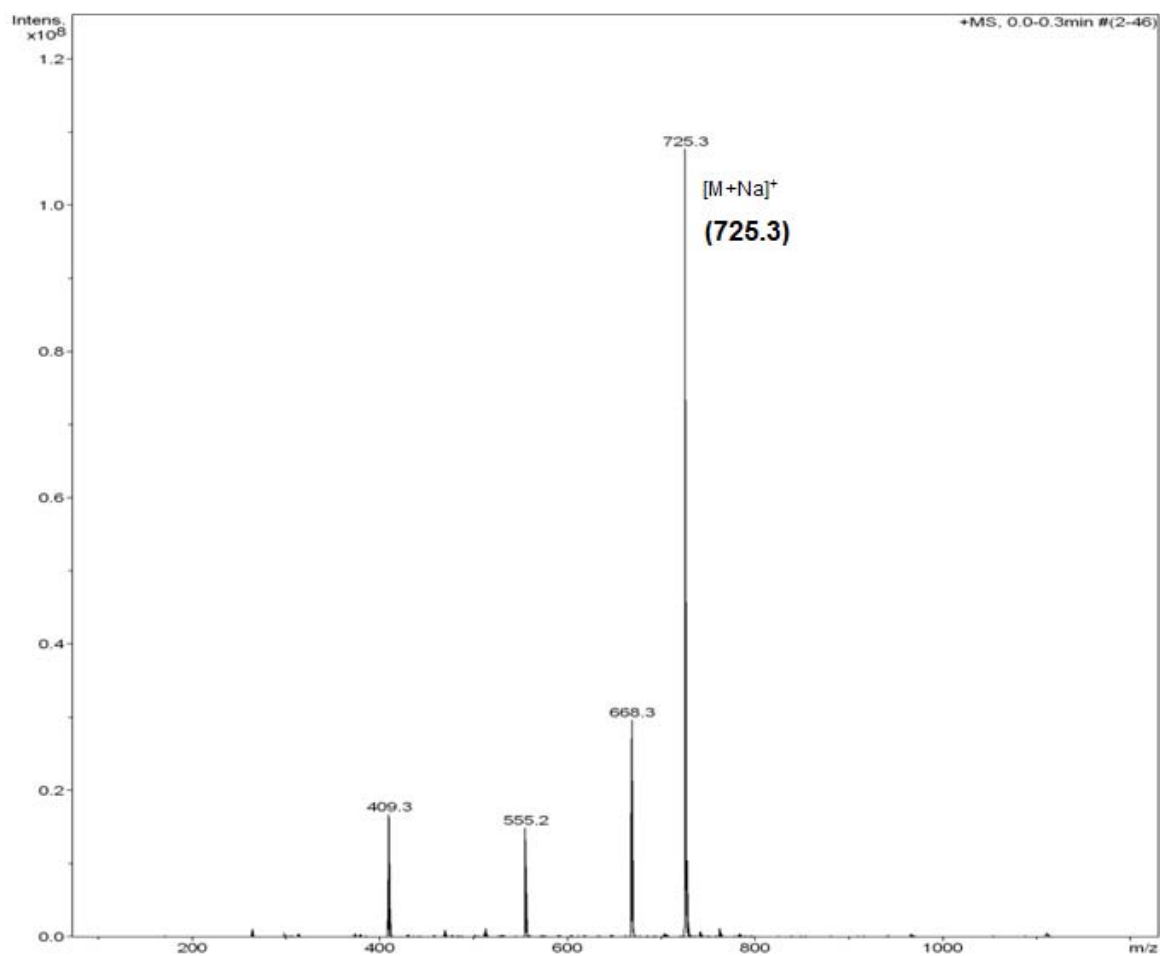

SI 22-HPLC trace (UV) of compound 3

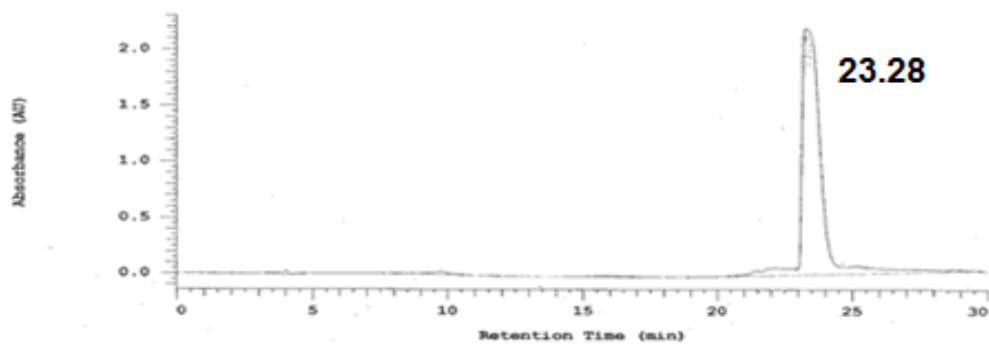

SI 23-MS(ESI) of compound 3

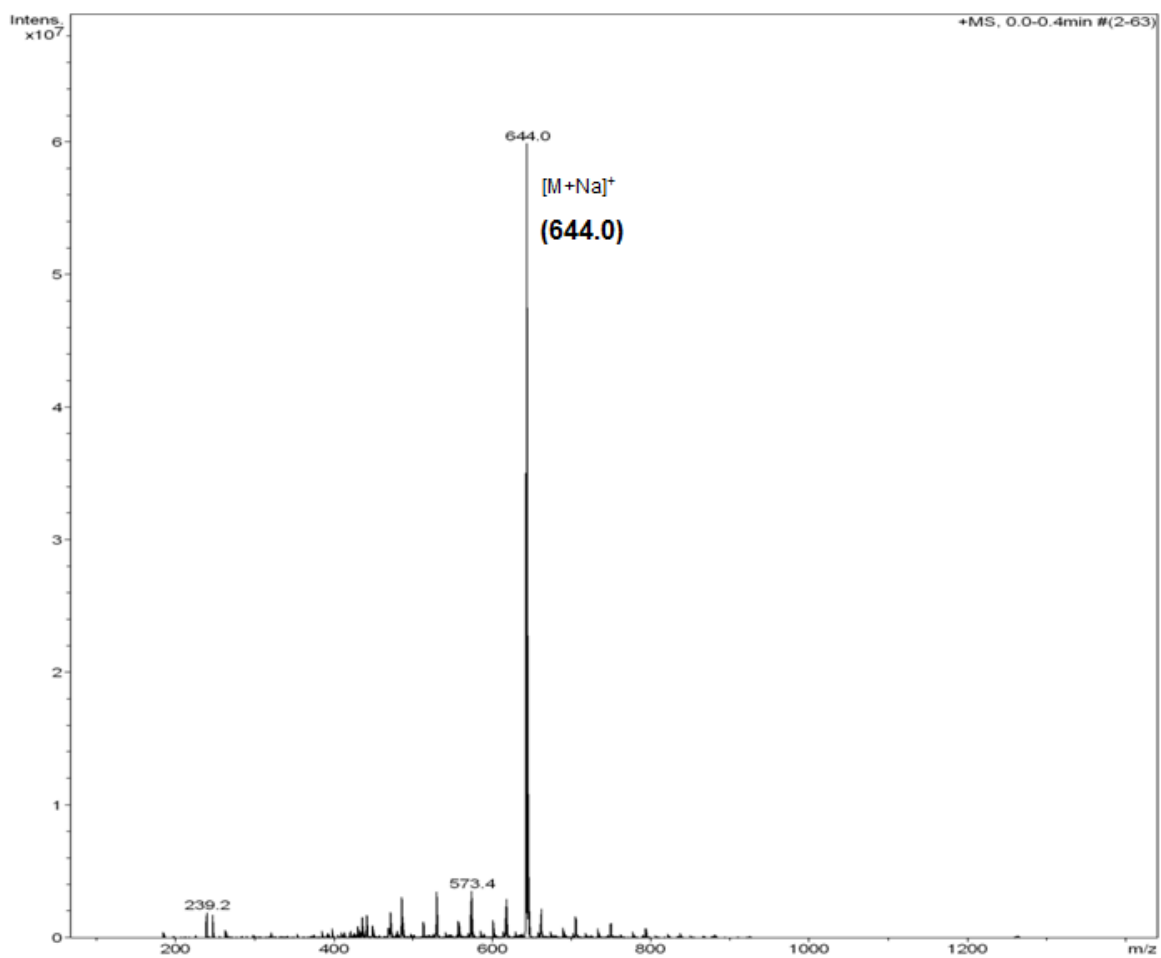



SI 24-HPLC trace (UV) of compound 4

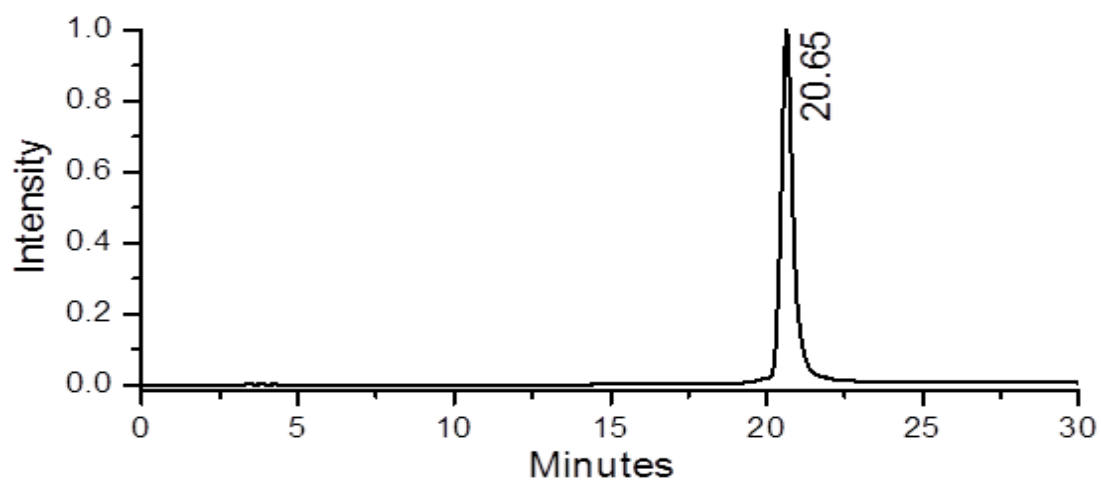

SI 25-MS(ESI) of compound 4

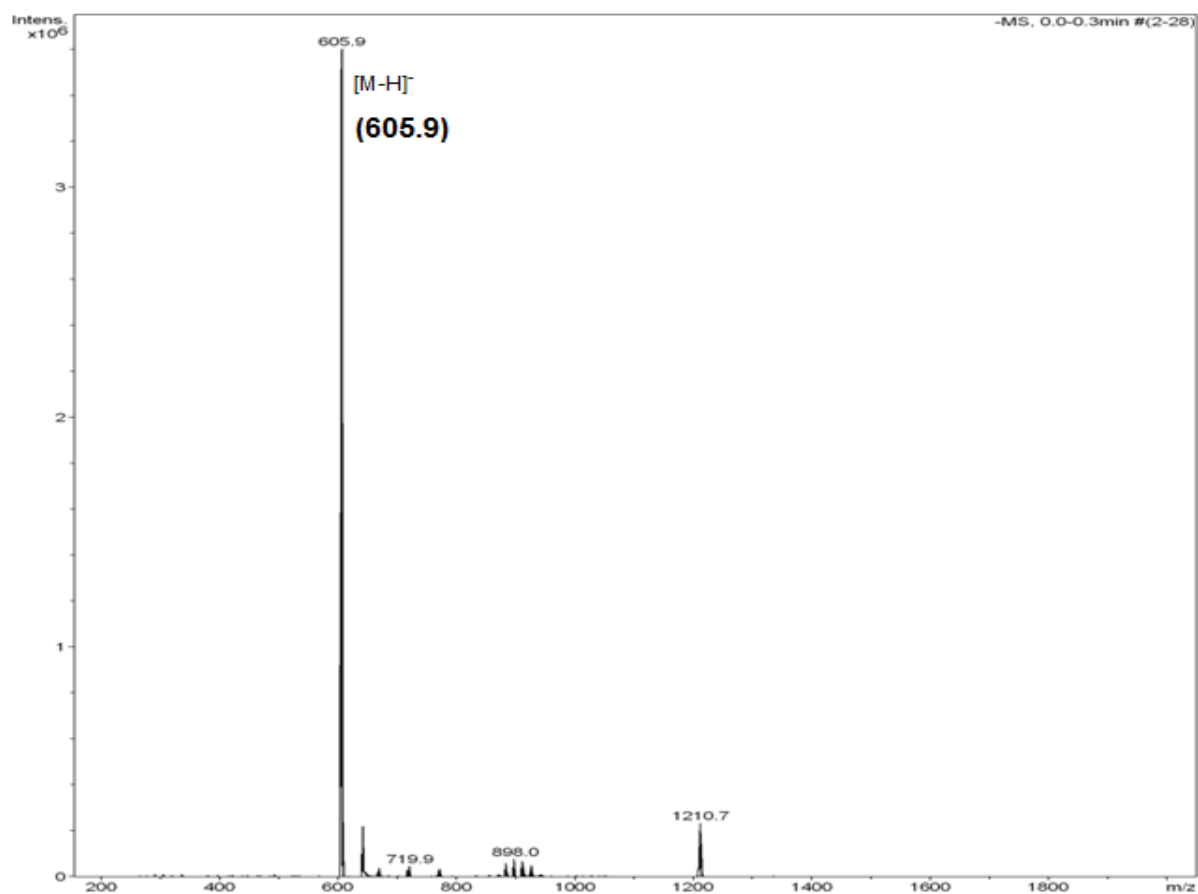

**SI 26-HPLC trace (UV) of compound 5**

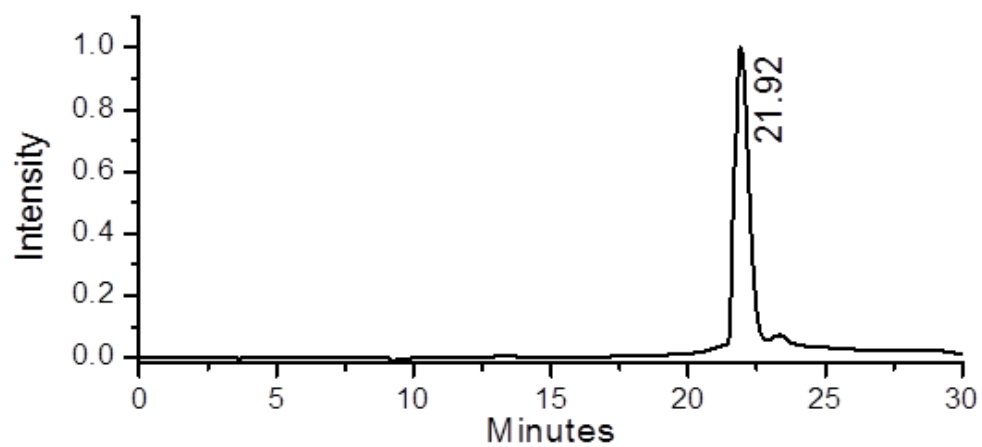

**SI 27-MS(ESI) of compound 5**

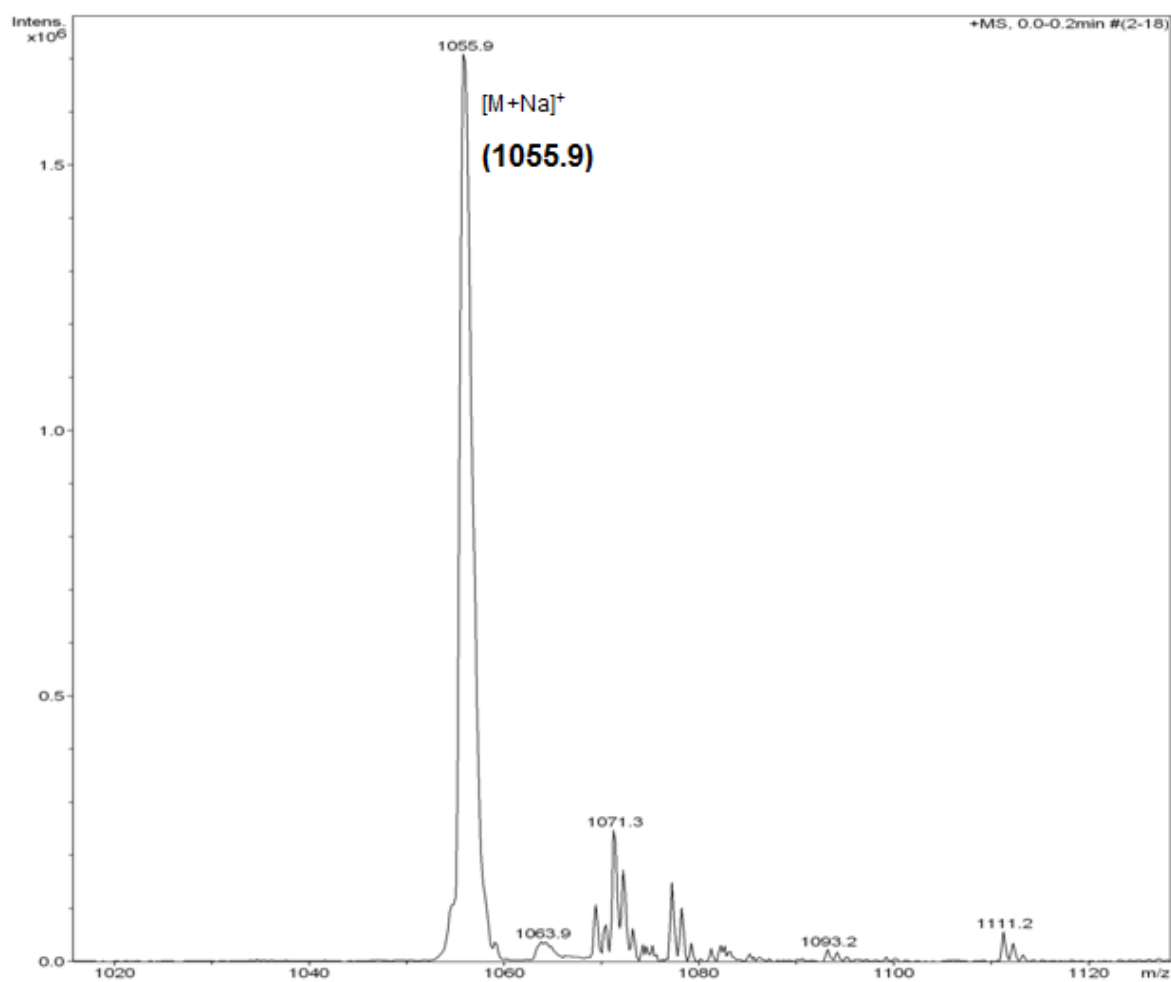

SI 28-HPLC trace (UV) of compound 6

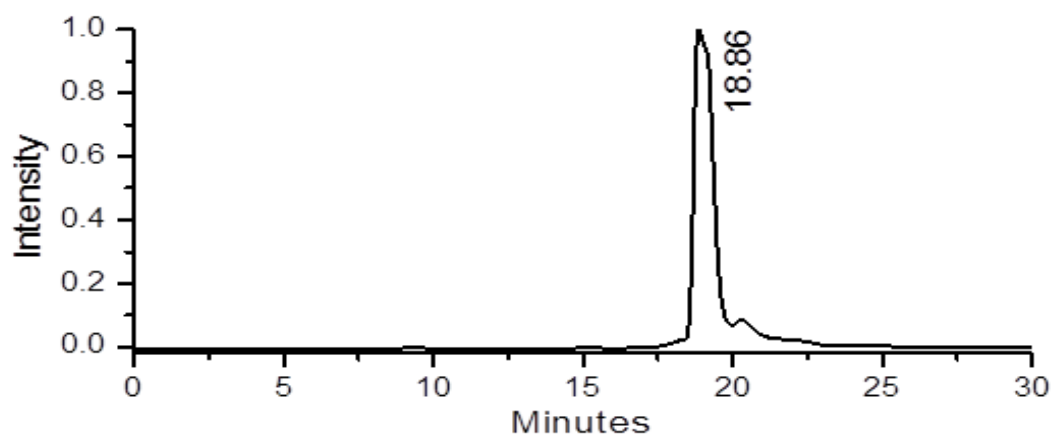

SI 29-MS(ESI) of compound 6

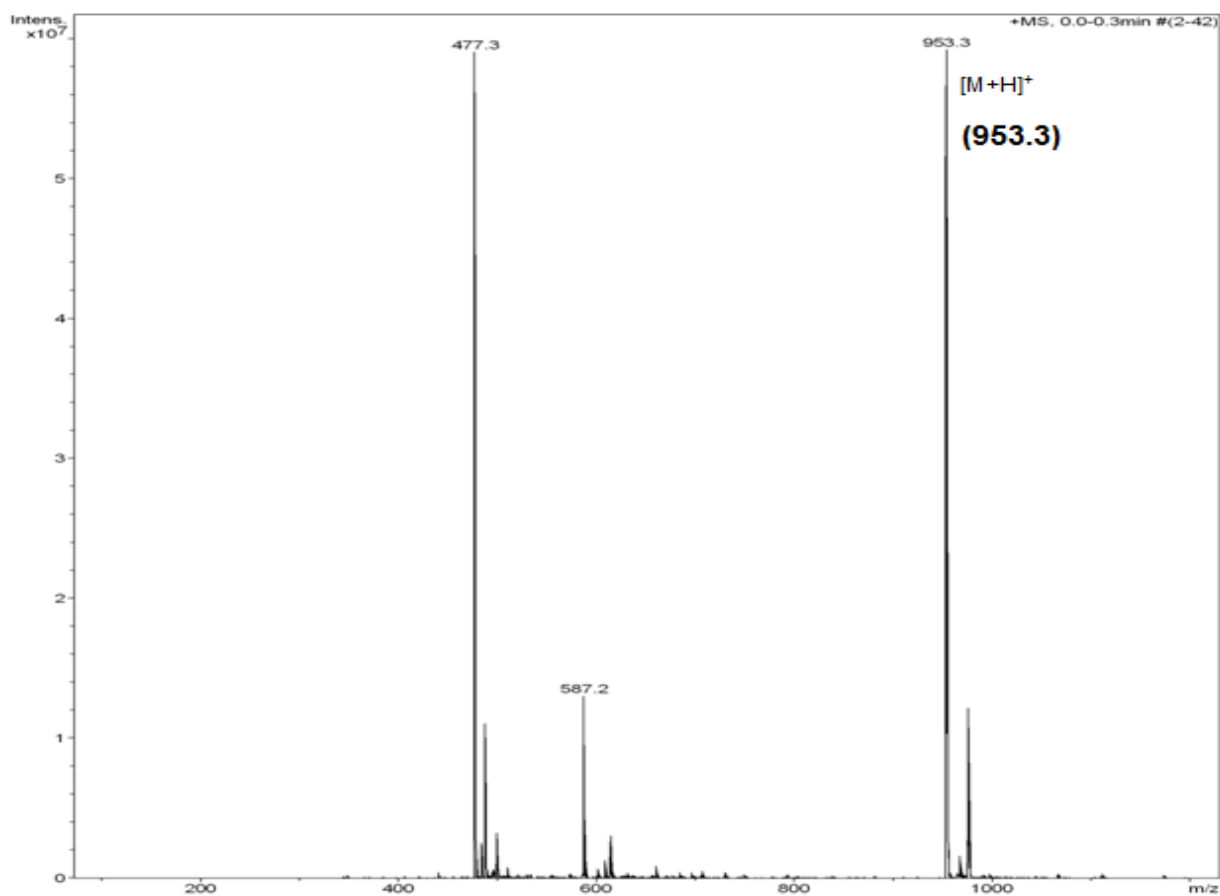

SI 30-HPLC trace (UV) of compound 7

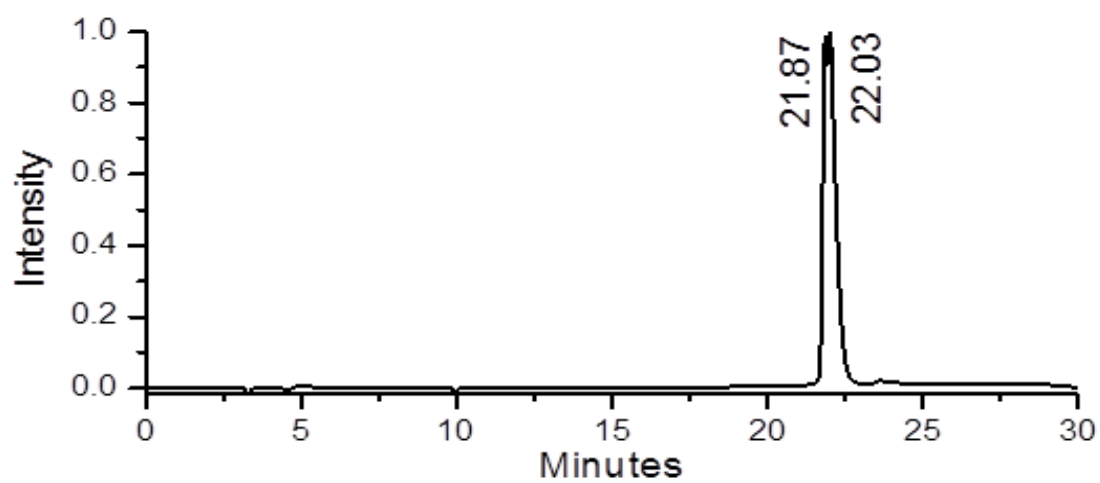

SI 31-MS(ESI) of compound 7

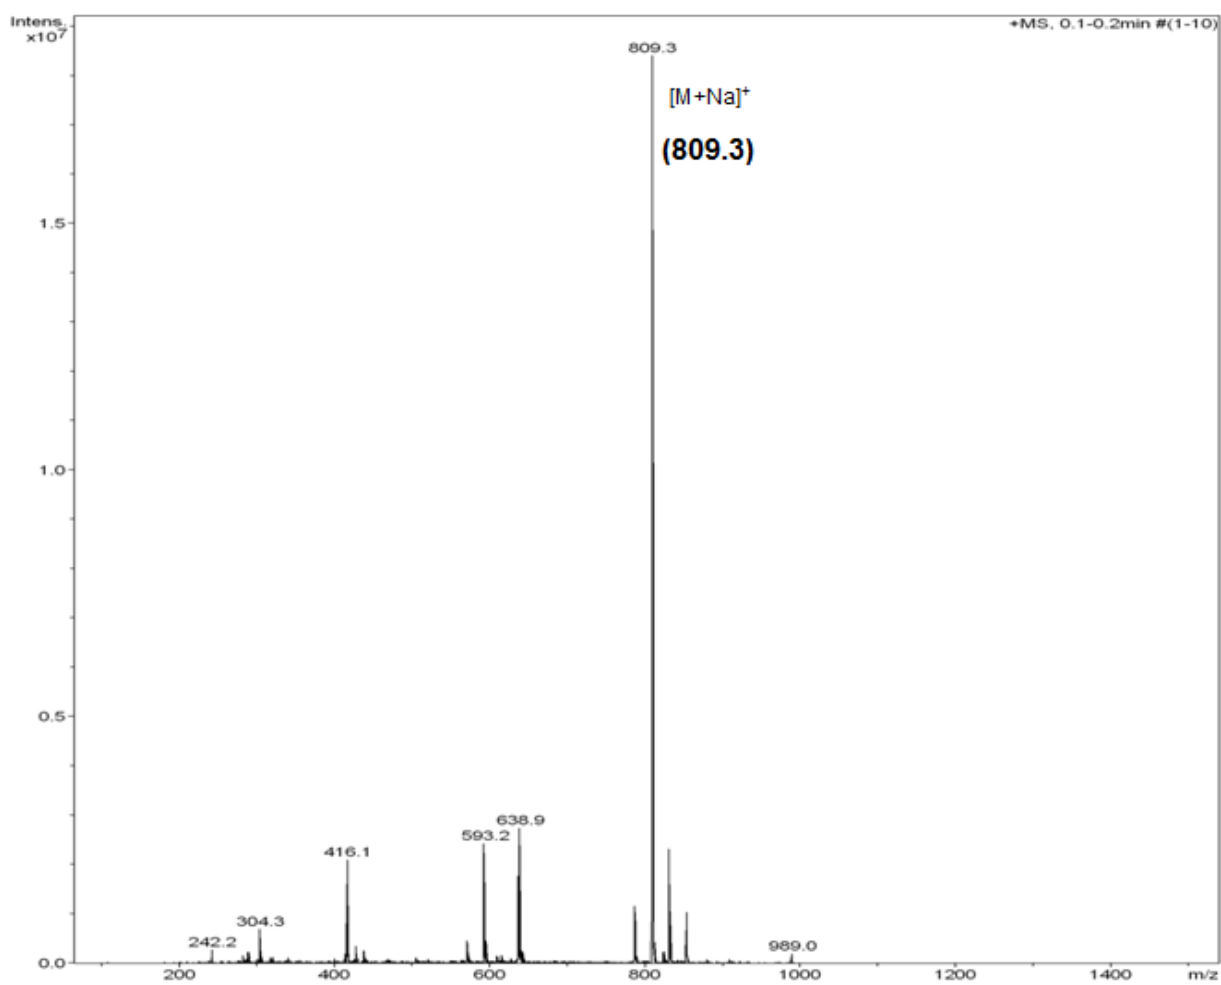

SI 32-HPLC trace (UV) of compound 8

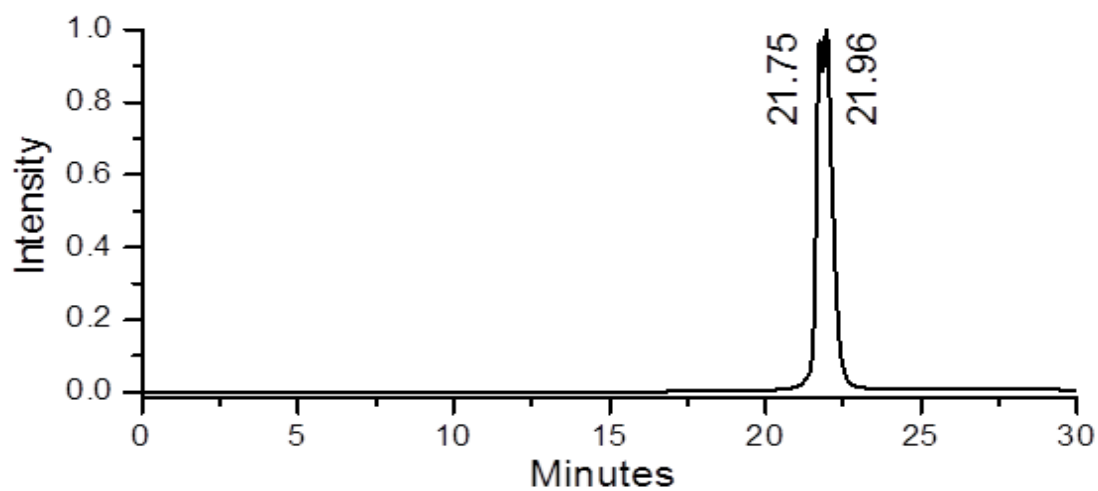

SI 33-MS(ESI) of compound 8

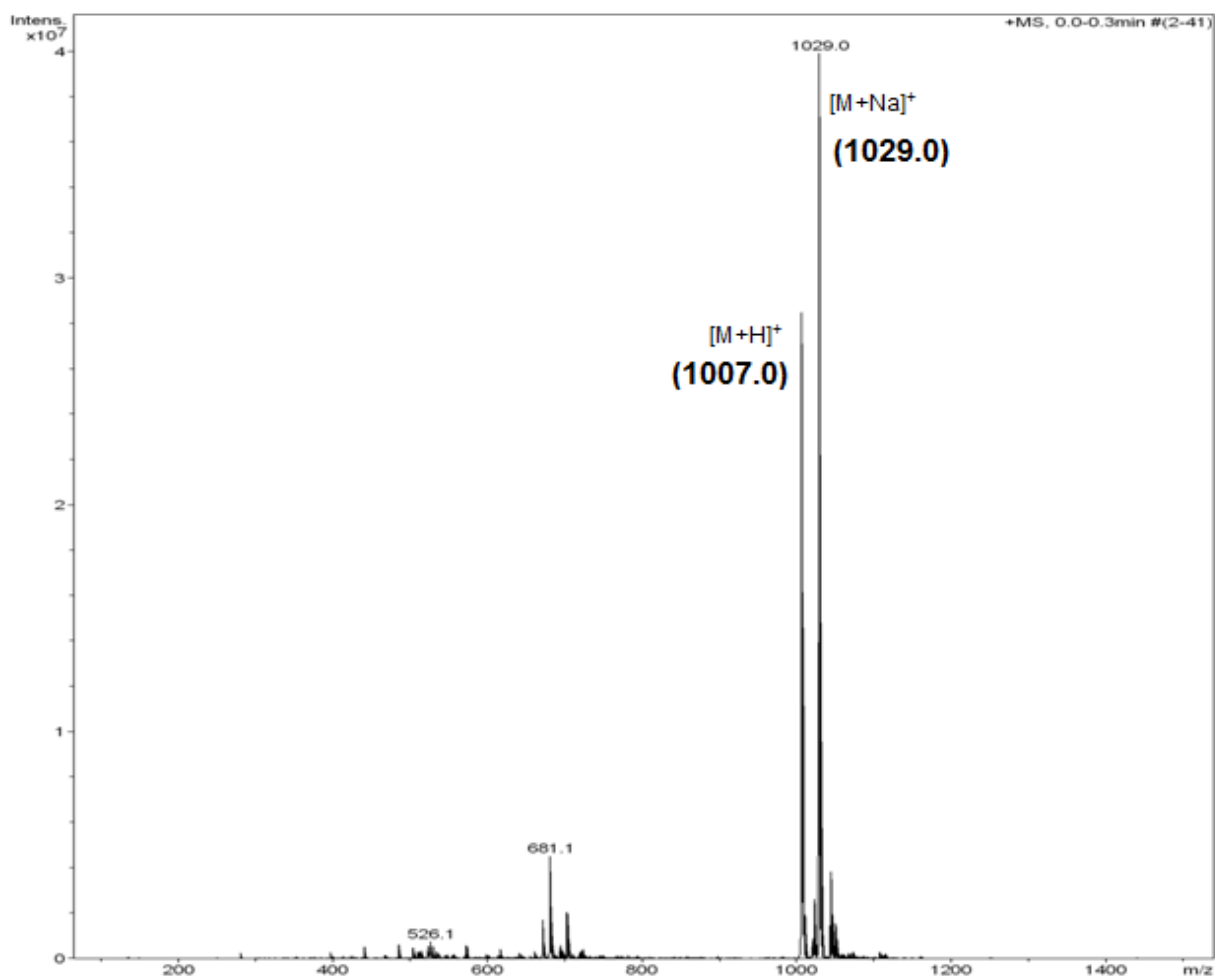

SI 34-HPLC trace (UV) of compound 9

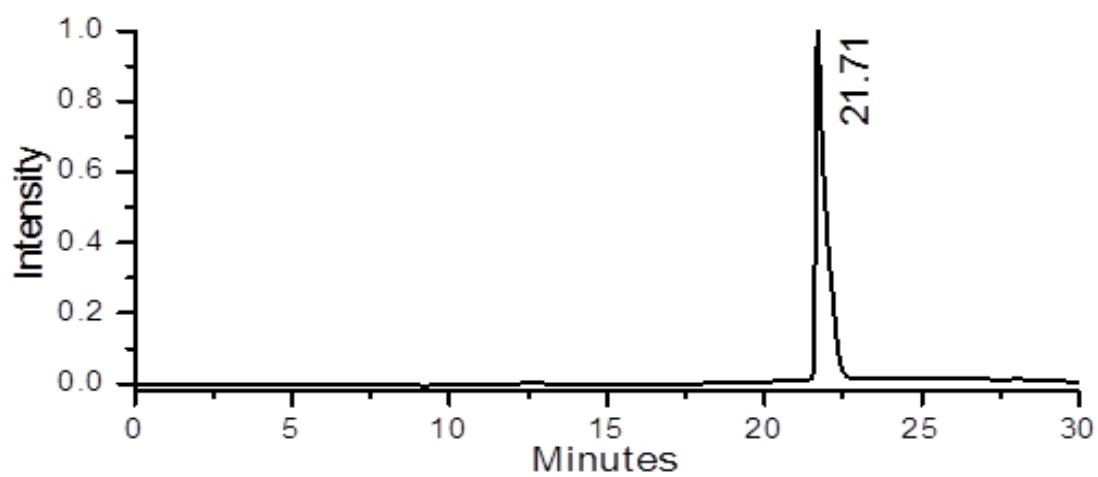

SI 35-MS(ESI) of compound 9

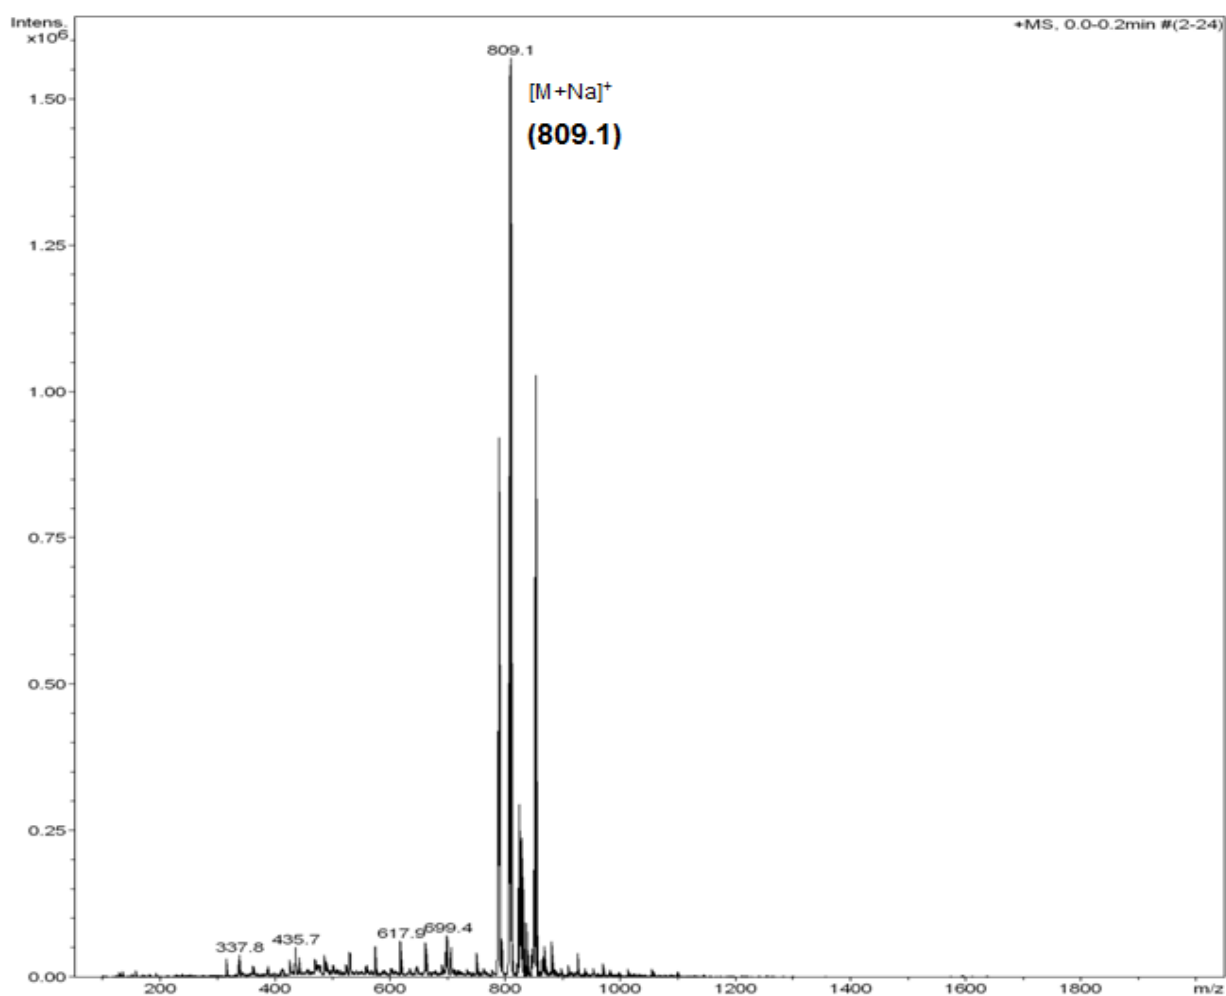

**SI 36-HPLC trace (UV) of compound 10**

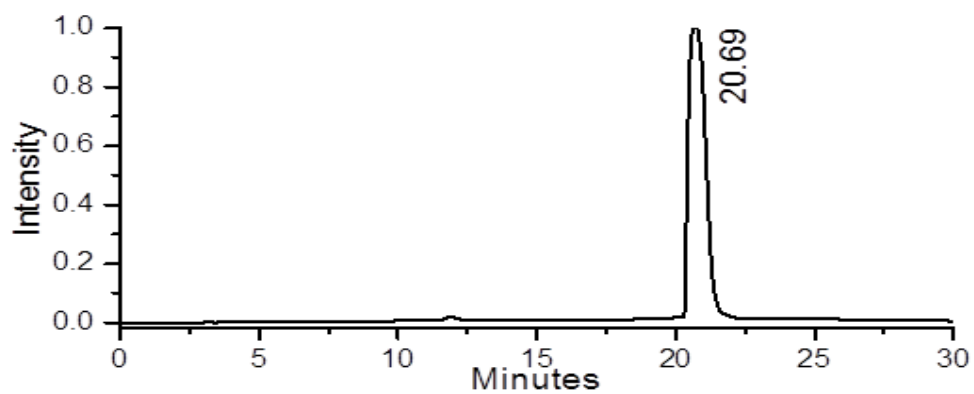

**SI 37-MS(ESI) of compound 10**

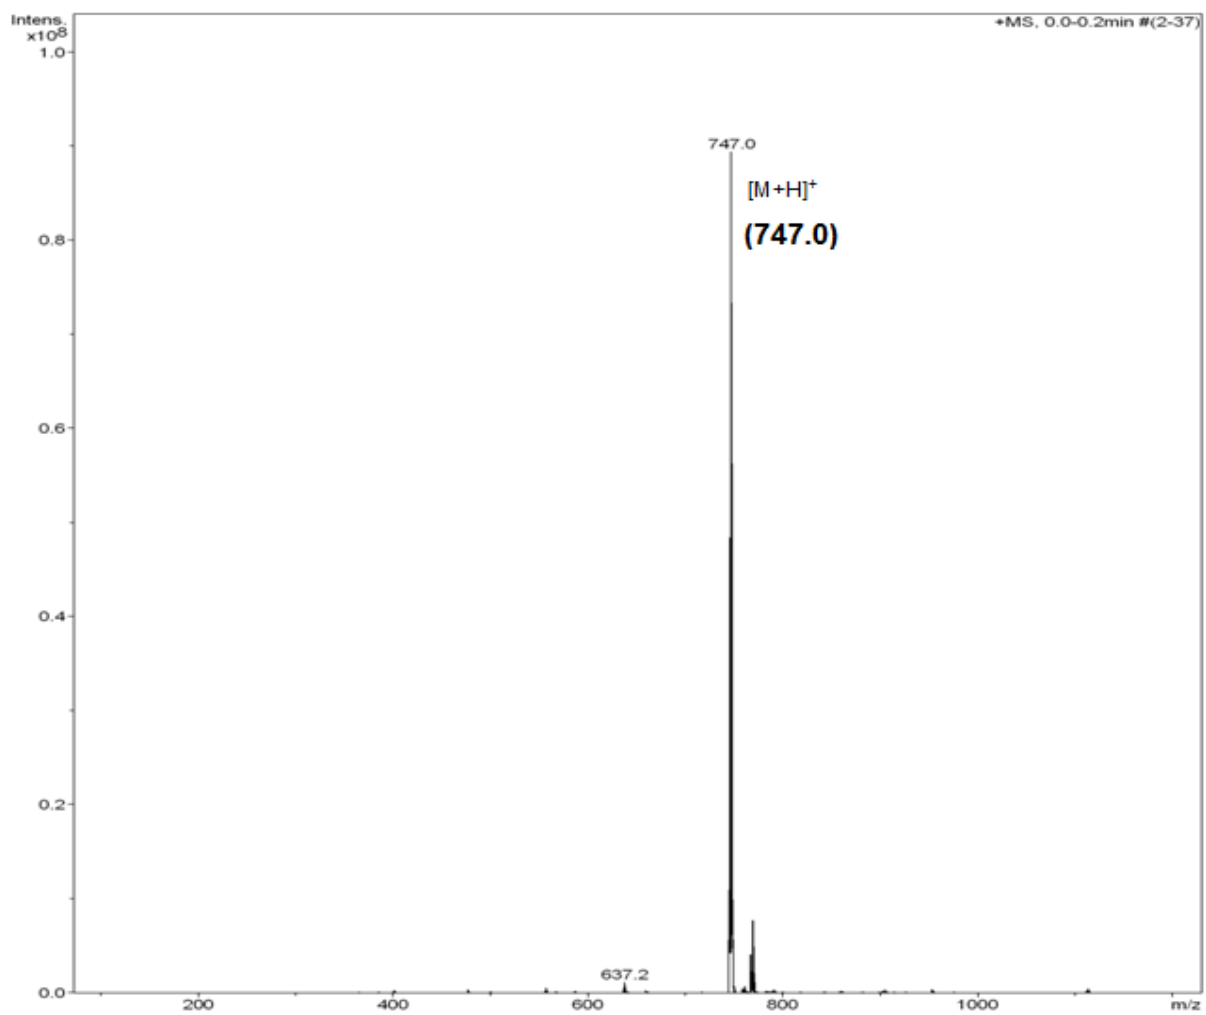

**SI 38-HPLC trace (UV) of compound 11**

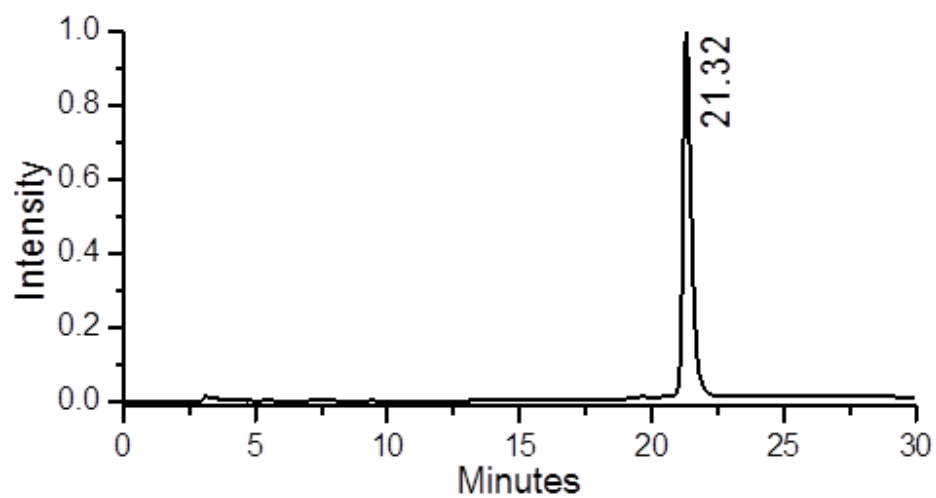

**SI 39-MS(ESI) of compound 11**

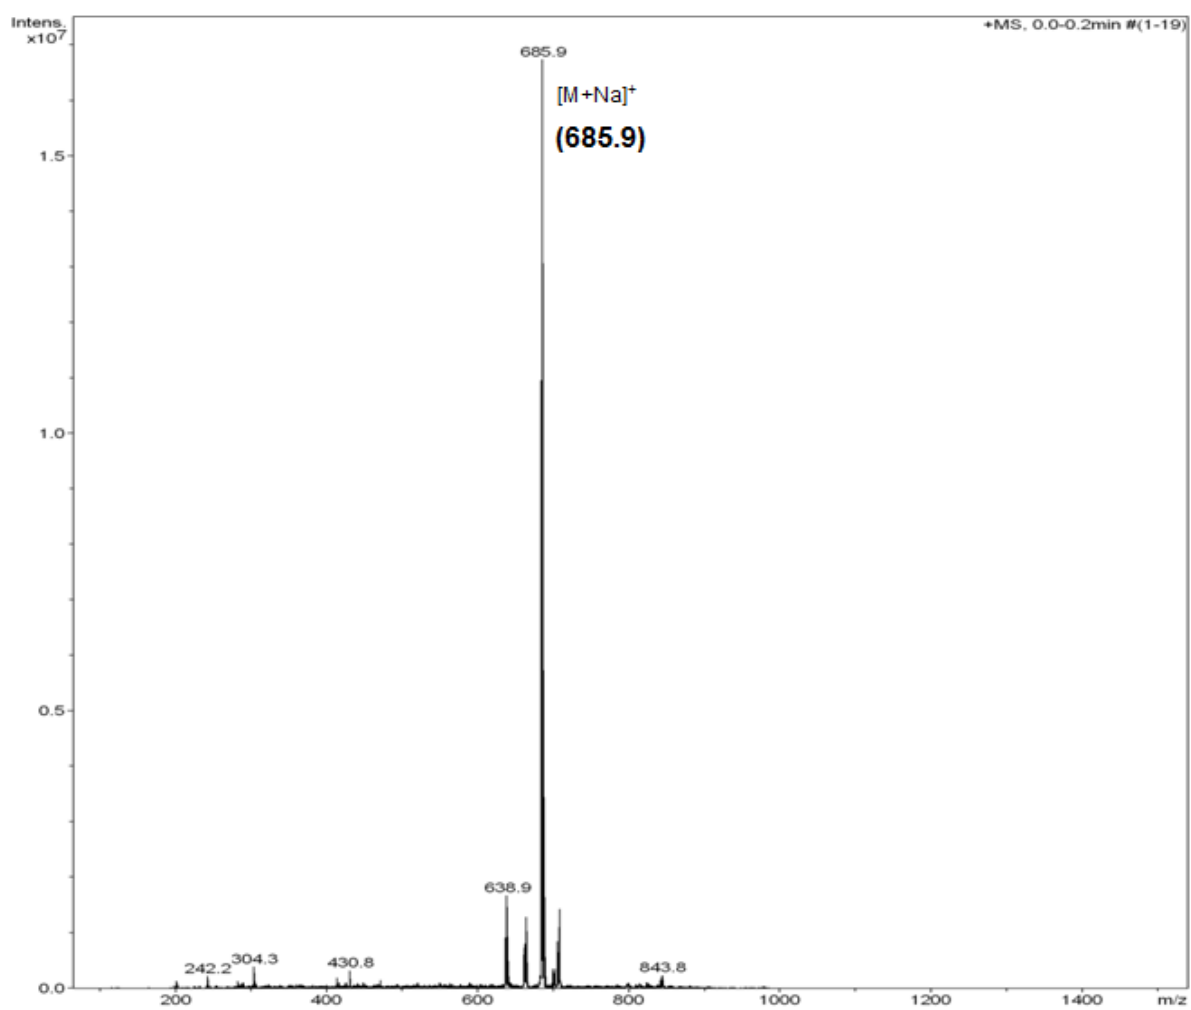



SI 40-HPLC trace (UV) of compound 12

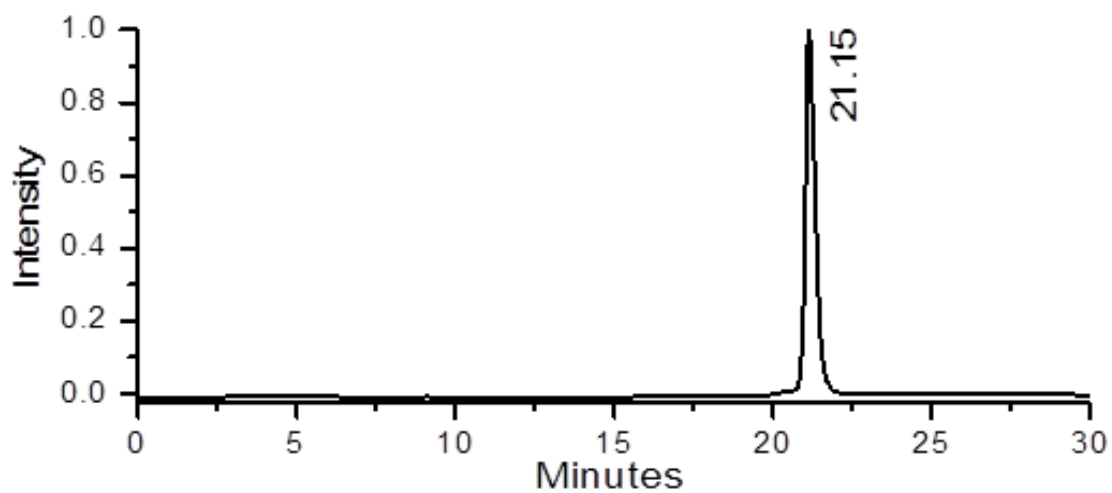

SI 41-MS(ESI) of compound 12

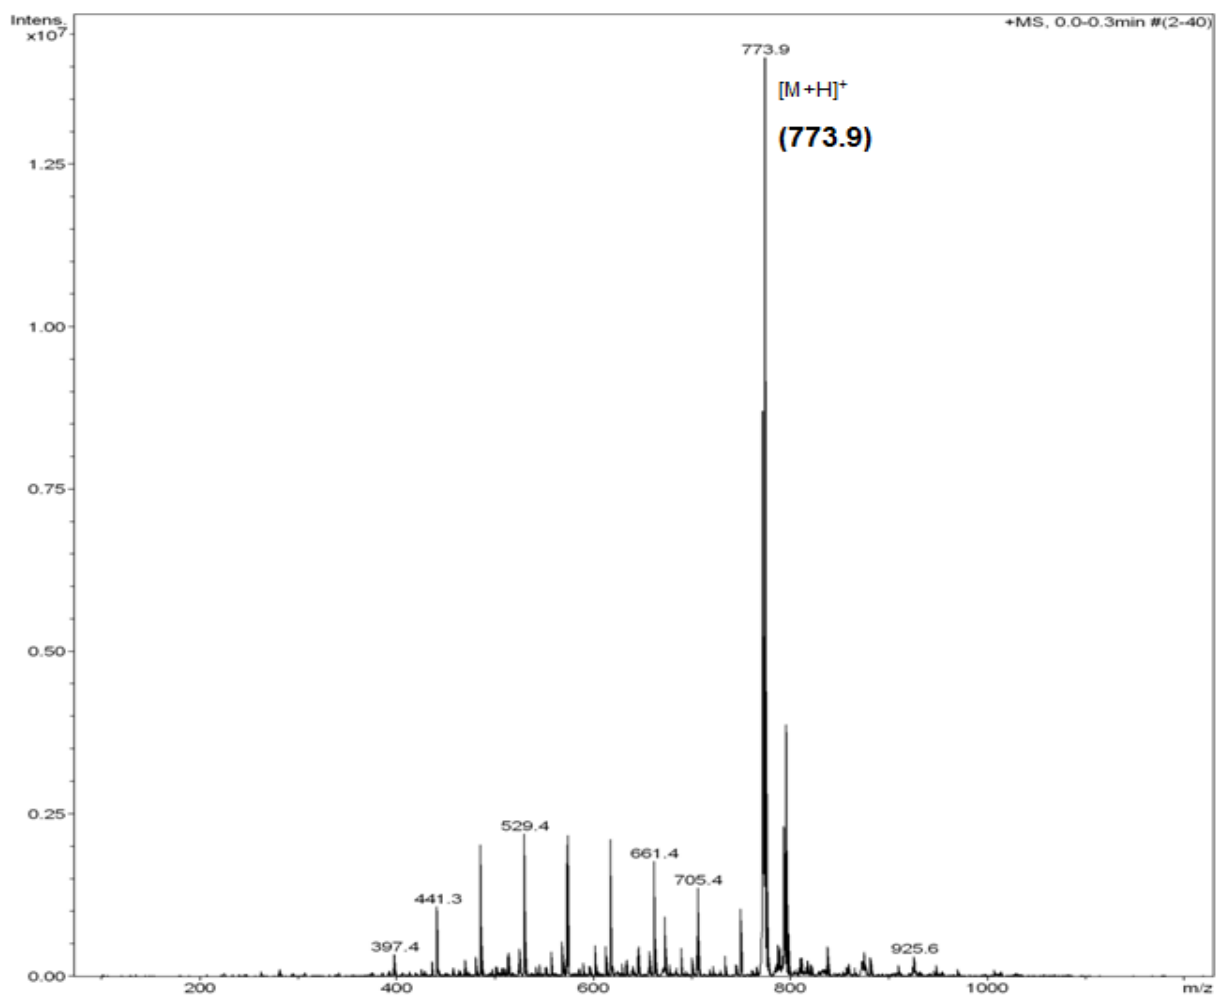

**SI 42-**Variation of radiochemical yield (%) of  $^{99m}\text{Tc}$ -complex **13** with time by one pot method from ligand **2** (5 mg) at 90 °C

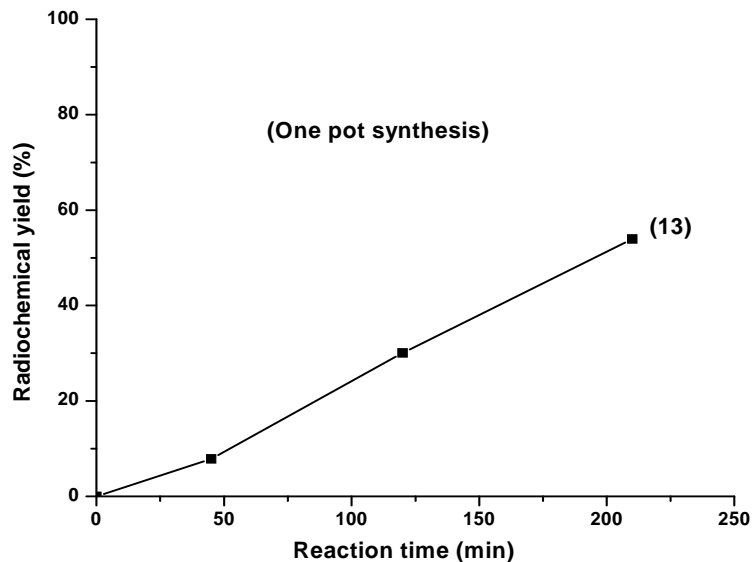

**SI 43-**Variation of radiochemical yield (%) of  $^{99m}\text{Tc}$ -complex **13** with time by two pot method from ligand **2** (5 mg) at 90 °C

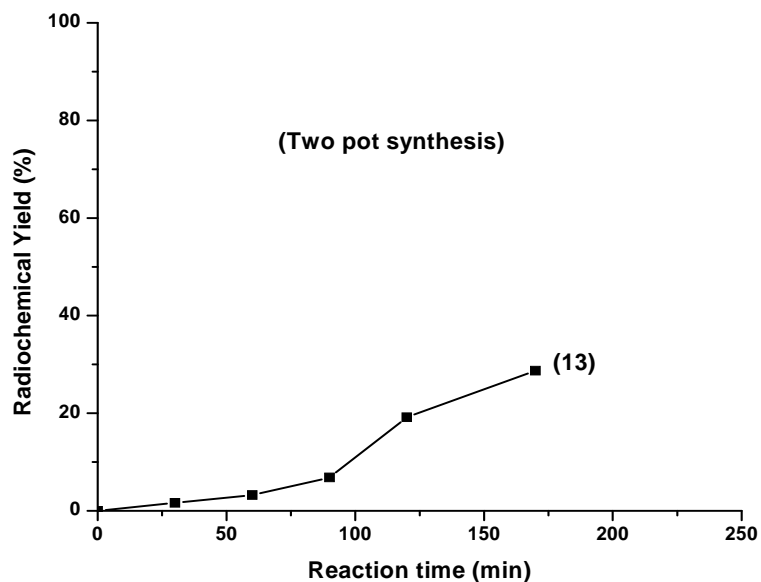

**SI 44** -Variation of radiochemical yield (%) of  $^{99m}\text{Tc}$ -complex **14** with time by one pot method from ligand **5** (2 mg) at 90 °C

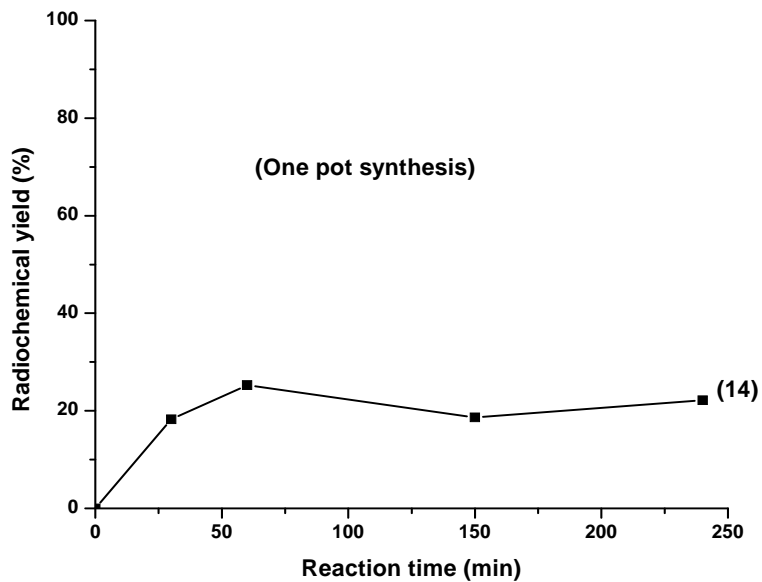

**SI 45**-Variation of radiochemical yield (%) of  $^{99m}\text{Tc}$ -complex **14** with time by two pot method from ligand **5** (5.7 mg) at 90 °C

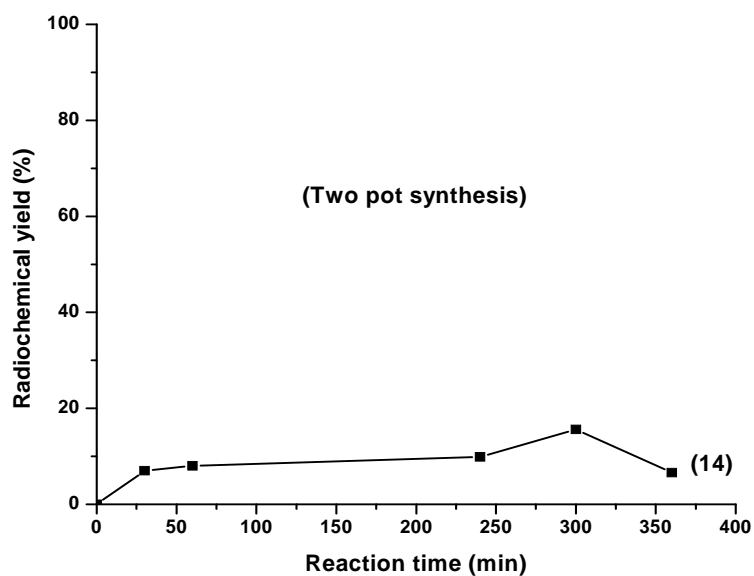

**SI 46-**Variation of radiochemical yield (%) of  $^{99m}\text{Tc}$ -complex **15** with time by one pot method from ligand **6** (2 mg) at 90 °C

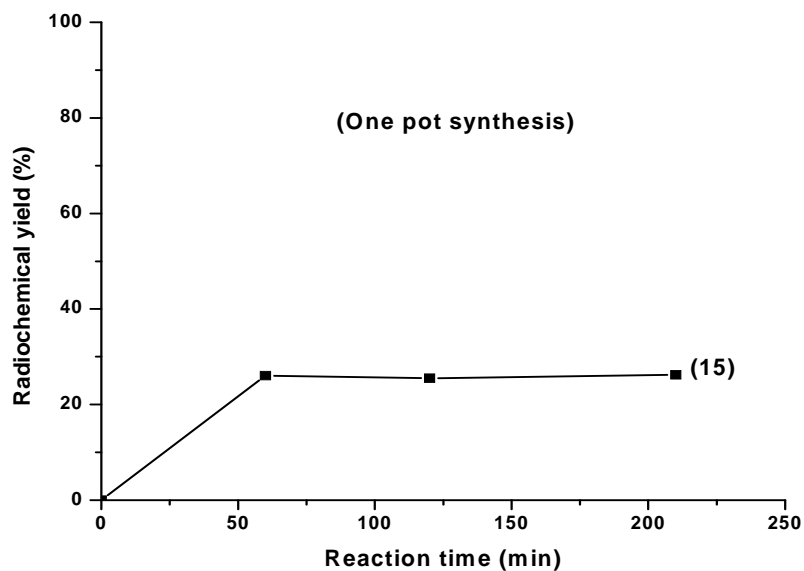

**SI 47-**Variation of radiochemical yield (%) of  $^{99m}\text{Tc}$ -complex **16** with time by one pot method from ligand **7** (2 mg) at 90 °C

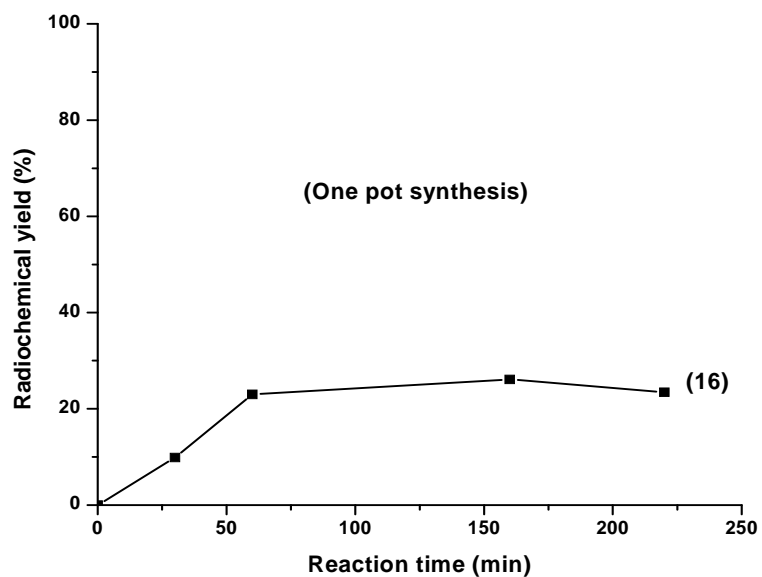

**SI 48**-Variation of radiochemical yield (%) of  $^{99m}\text{Tc}$ -complex **16** with time by two pot method from ligand **7** (5.3 mg) at 90 °C

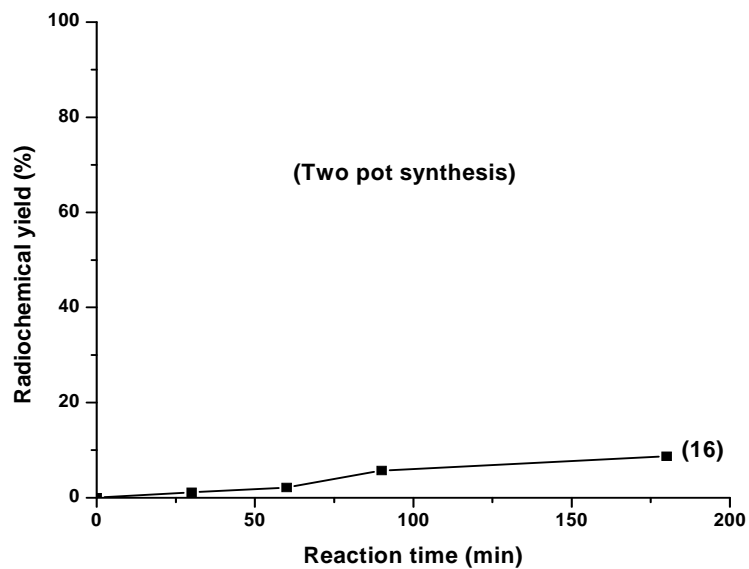

**SI 49**-Variation of radiochemical yield (%) of  $^{99m}\text{Tc}$ -complex **17** with time by one pot method from ligand **8** (2 mg) at 90 °C

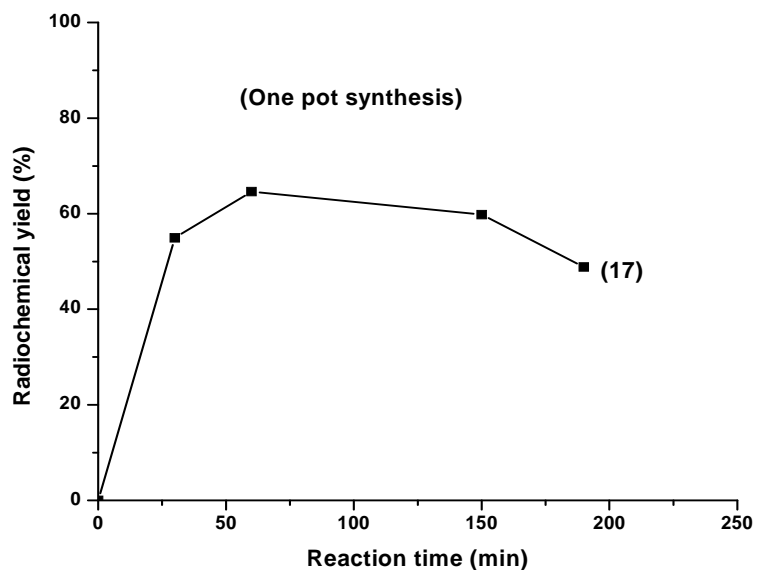

**SI 50**-Variation of radiochemical yield (%) of  $^{99m}\text{Tc}$ -complex **17** with time by two pot method from ligand **8** (5.8 mg) under microwave at 110 °C

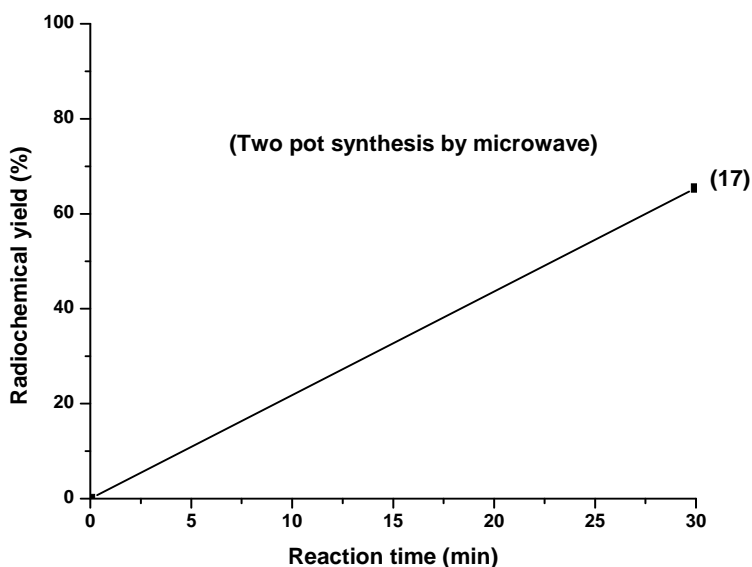

**SI 51**-Variation of radiochemical yield of  $^{99m}\text{Tc}$ -complexes **13-17** with time by one pot method from ligand **2, 5-7** (0.6 mg), **8** (1.5 mg) under microwave at 110 °C

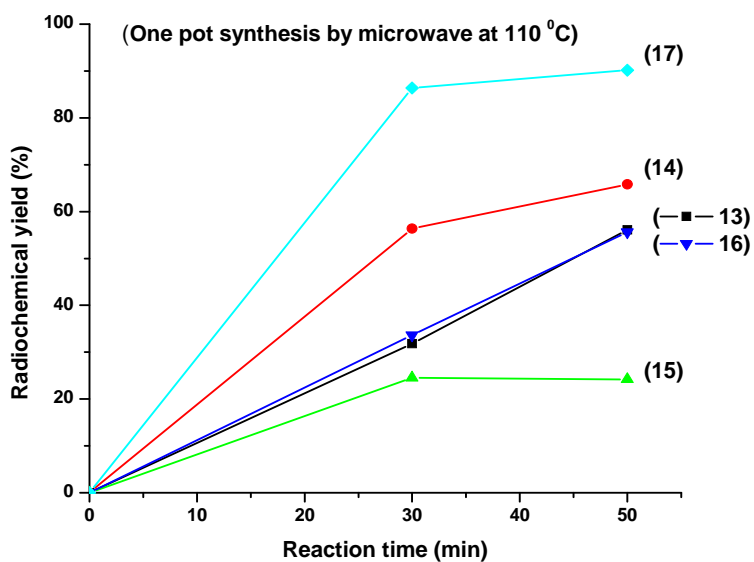

**SI 52** -HPLC traces of crude labeling solutions with dipeptide **2** yielding  $^{99m}\text{Tc}$  compound **13** ( $\gamma$ -trace top and UV trace bottom)

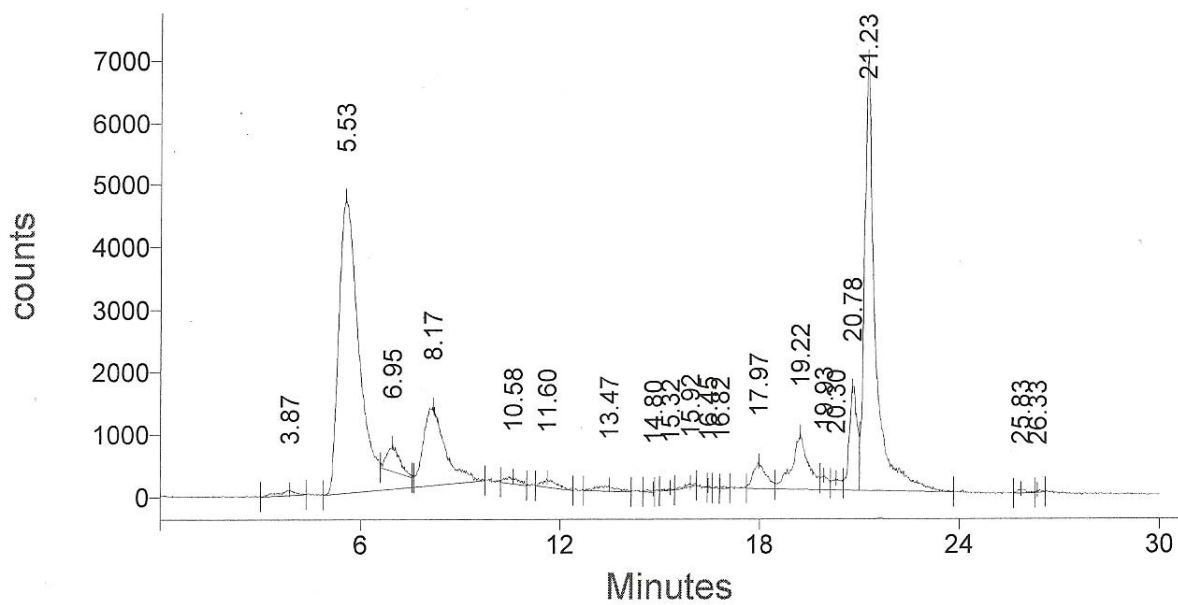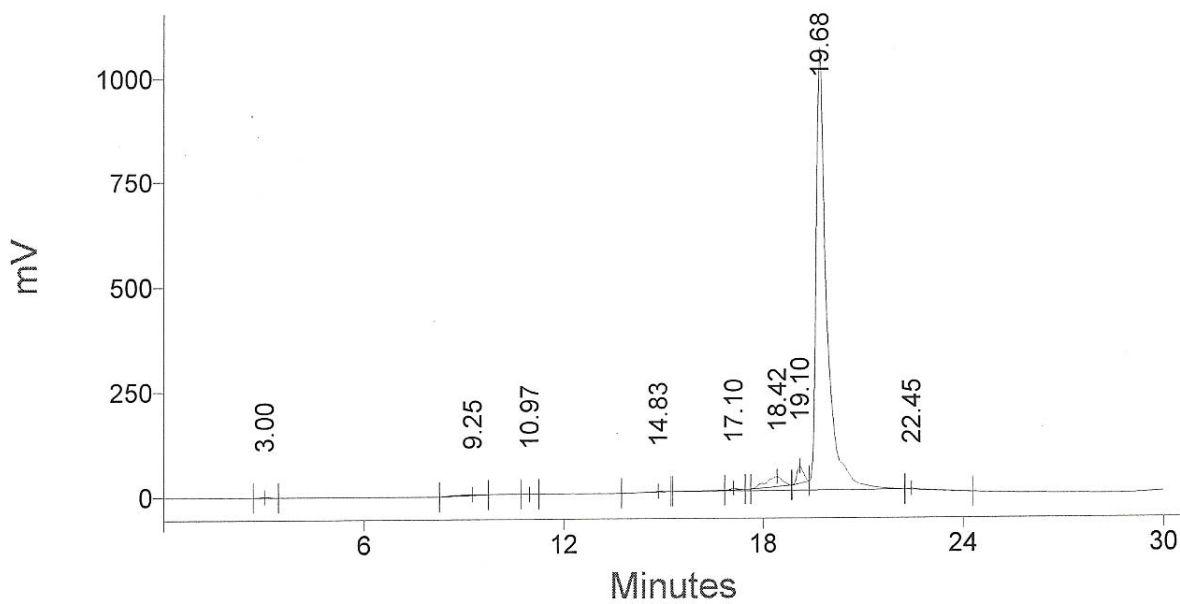

SI 53-HPLC traces of crude labeling solutions with dipeptide **7** yielding  $^{99m}\text{Tc}$  compound **16** ( $\gamma$ -trace top and UV trace bottom)

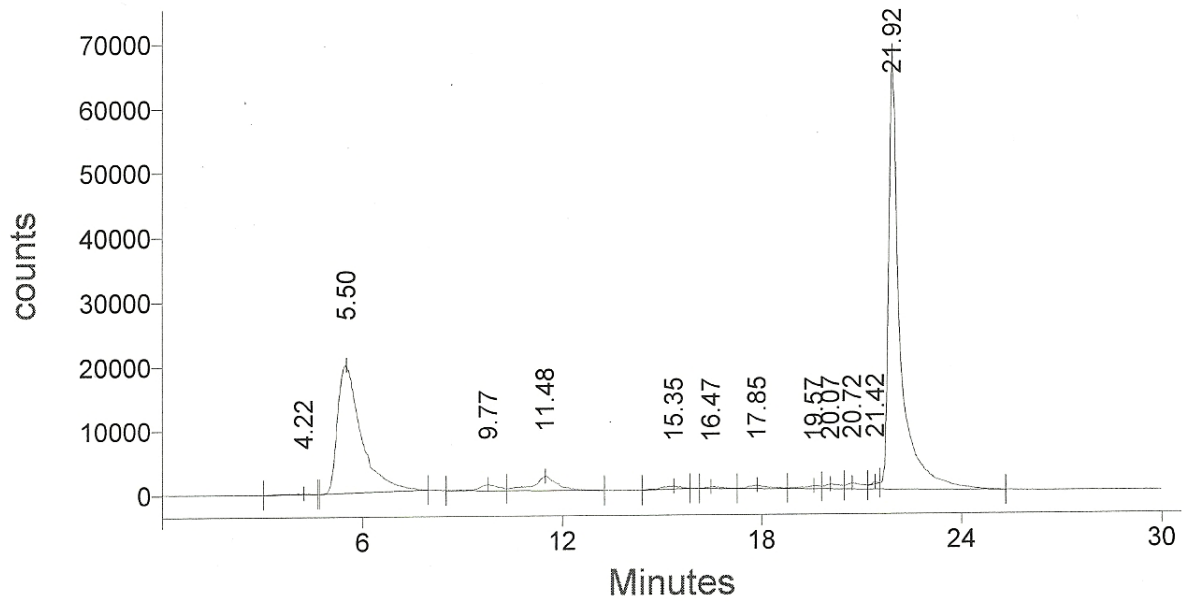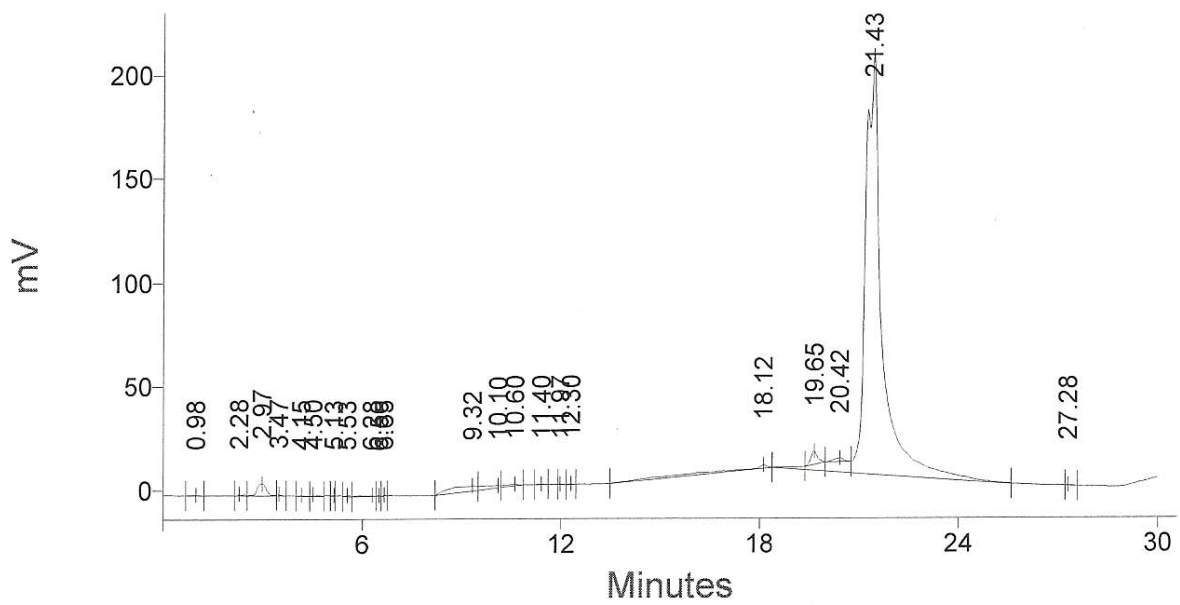



**SI 54-HPLC traces of crude labeling solutions with dipeptide **8** yielding  $^{99m}\text{Tc}$  compound **17** ( $\gamma$ -trace top and UV trace bottom)**

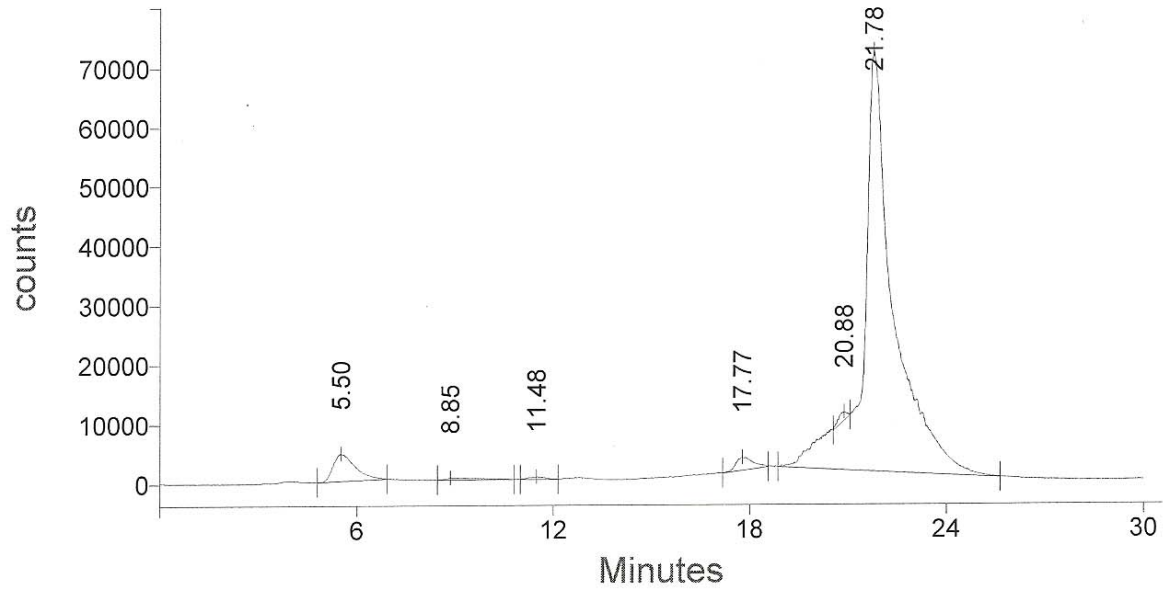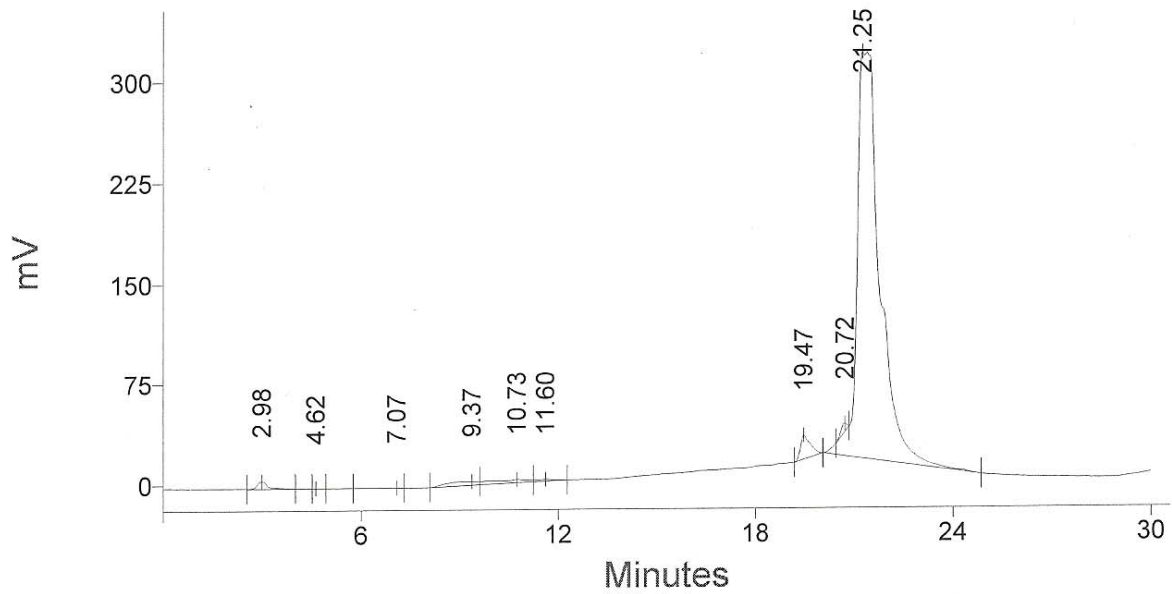

**SI 55-HPLC coinjection traces of Re-complex 4 and the corresponding  $^{99m}\text{Tc}$ -complex 13**

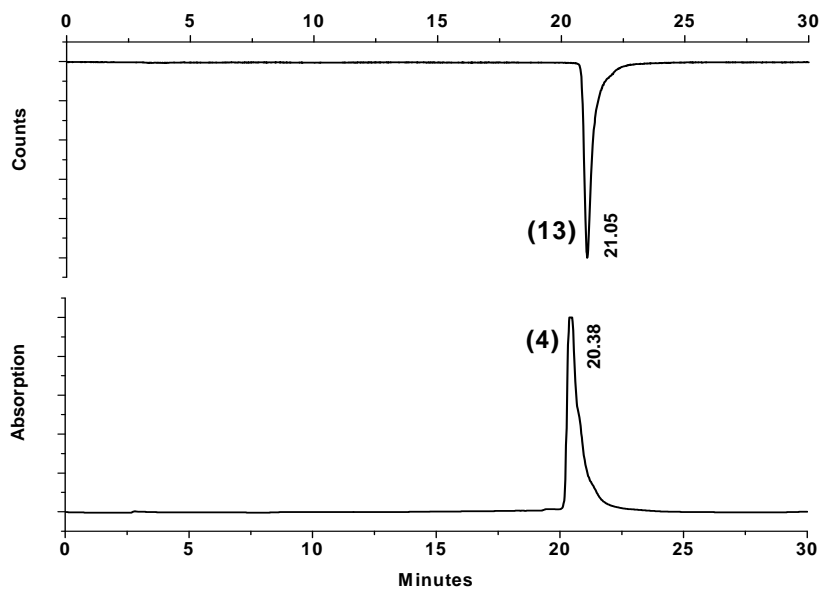

**SI 56-HPLC coinjection traces of Re-complex 9 and the corresponding  $^{99m}\text{Tc}$ -complex 14**

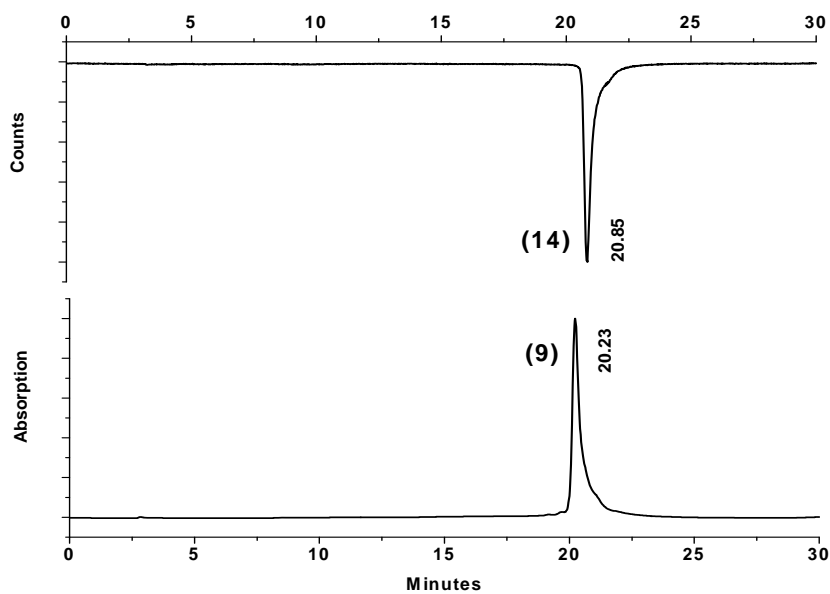

**SI 57-HPLC coinjection traces of Re-complex 10 and the corresponding  $^{99m}\text{Tc}$ -complex 15**

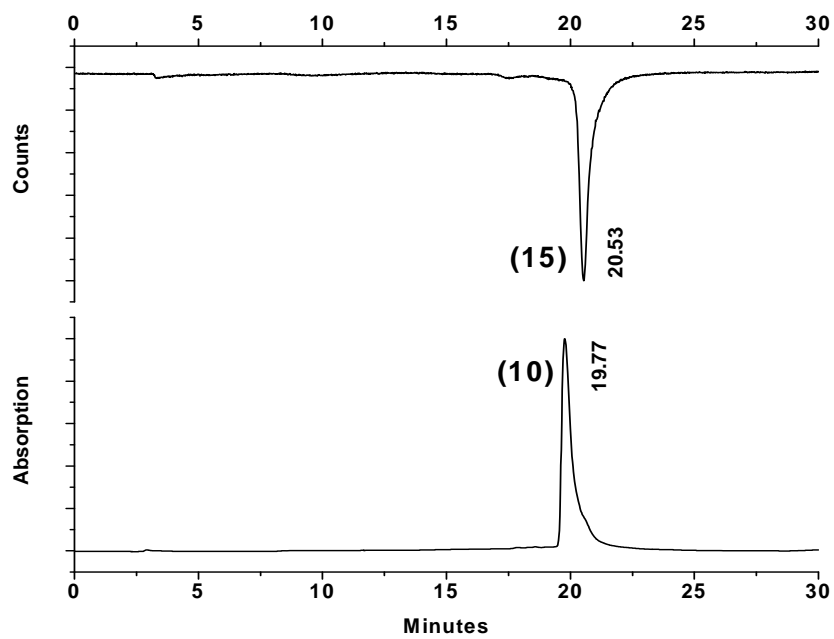

**SI 58-HPLC coinjection traces of Re-complex 11 and the corresponding  $^{99m}\text{Tc}$ -complex 16**

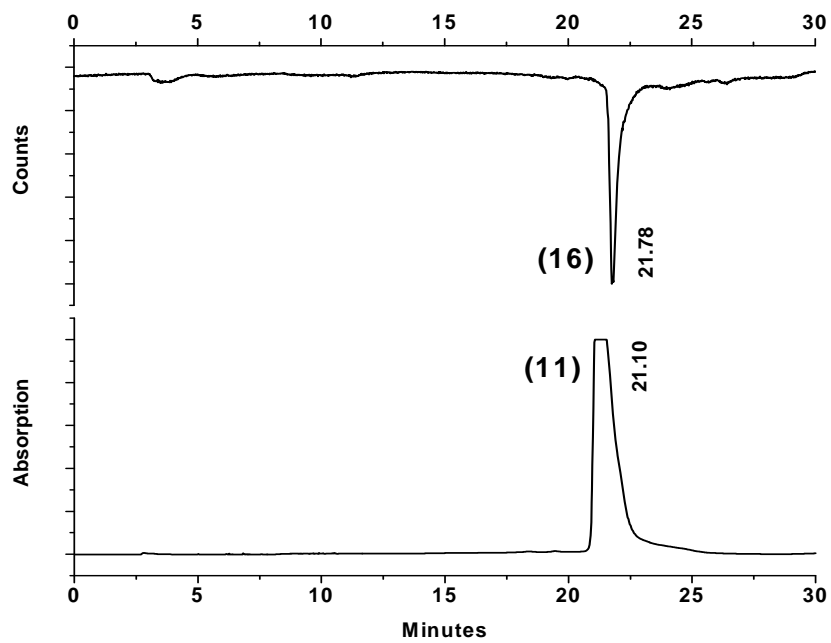

**SI 59-HPLC coinjection traces of Re-complex 12 and the corresponding  $^{99m}\text{Tc}$ -complex 17**

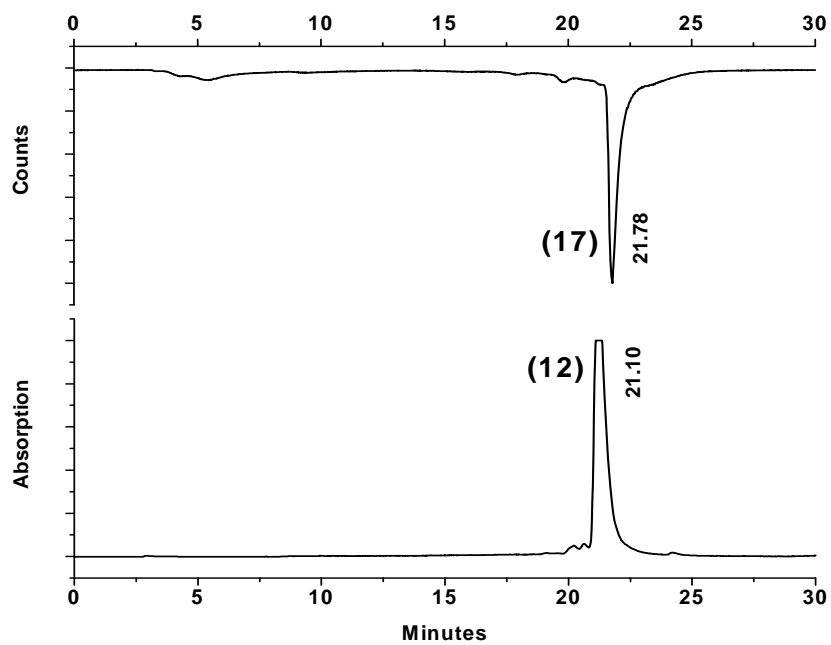

Supplement: c3ob41866a1.pdf [file c3ob41866a1.pdf]
